# Supplementary material for: RAS and RHO Families of GTPases Directly Regulate Distinct Phosphoinositide 3-Kinase Isoforms
Source: PubMed Central journal article supplement — Cell. 2013 May 23;153(5):1050–63. doi: 10.1016/j.cell.2013.04.031 (PMC3690480; doi:10.1016/j.cell.2013.04.031), 2013-05-23
Supplement: mmc1.pdf [file mmc1.pdf]

**Table S1. siRNA Sequences**

|             |                      |
|-------------|----------------------|
| siDock180-1 | GAGAAUGACUCCUUCAAA   |
| siDock180-2 | GAACAUGGAUAUCAACAGA  |
| siDock180-3 | GAAAGUCGAUGAUGAAGAU  |
| siDock180-4 | UGAAUGAGGUACAGCGAUU  |
| siElmo1-1   | GGAAGGACAUGAUGAGUGA  |
| siElmo1-2   | UGAGAGCGCUUACAACCAA  |
| siElmo1-3   | UCACAAGGUCUUACAUIIAU |
| siElmo1-4   | CGACUCAAAUIUGCCAACUG |
| siRAC1-1    | AGACGGAGCUGUUGGUAAA  |
| siRAC1-2    | UGAGAACACCUAAGCACUA  |
| siRAC1-3    | GCGUUGAGUCCAUIIUUAA  |
| siRAC1-4    | GCAACUAGGUGUGCAAUUC  |
| siCDC42-1   | AUAGAAACGCCUCGAUIIA  |
| siCDC42-2   | GAAGGUGGGUGGACGCUGU  |
| siCDC42-3   | GGCUGAAGCUUUCGCAAGA  |
| siCDC42-4   | GGAUIIAUGACAGACUACGA |
