# Supplementary material for: RAS and RHO Families of GTPases Directly Regulate Distinct Phosphoinositide 3-Kinase Isoforms
Source: PubMed Central journal article supplement — Cell. 2013 May 23;153(5):1050–63. doi: 10.1016/j.cell.2013.04.031 (PMC3690480; doi:10.1016/j.cell.2013.04.031), 2013-05-23
Supplement: mmc2.pdf [file mmc2.pdf]

# RAS and RHO Families of GTPases Directly Regulate Distinct Phosphoinositide 3-Kinase Isoforms

Ralph Fritsch,<sup>1</sup> Inge de Krijger,<sup>1</sup> Kornelia Fritsch,<sup>2</sup> Roger George,<sup>3</sup> Beth Reason,<sup>1</sup> Madhu S. Kumar,<sup>1</sup> Markus Diefenbacher,<sup>4</sup> Gordon Stamp,<sup>2</sup> and Julian Downward<sup>1,5,\*</sup>

<sup>1</sup>Signal Transduction Laboratory

<sup>2</sup>Experimental Histopathology Laboratory

<sup>3</sup>Protein Purification Facility

<sup>4</sup>Mammalian Genetics Laboratory

Cancer Research UK London Research Institute, 44 Lincoln's Inn Fields, London WC2A 3LY, UK

<sup>5</sup>Lung Cancer Group, Division of Cancer Biology, The Institute of Cancer Research, 237 Fulham Road, London SW3 6JB, UK

\*Correspondence: [julian.downward@cancer.org.uk](mailto:julian.downward@cancer.org.uk)

<http://dx.doi.org/10.1016/j.cell.2013.04.031>

## SUMMARY

RAS proteins are important direct activators of p110 $\alpha$ , p110 $\gamma$ , and p110 $\delta$  type I phosphoinositide 3-kinases (PI3Ks), interacting via an amino-terminal RAS-binding domain (RBD). Here, we investigate the regulation of the ubiquitous p110 $\beta$  isoform of PI3K, implicated in G-protein-coupled receptor (GPCR) signaling, PTEN-loss-driven cancers, and thrombocyte function. Unexpectedly, RAS is unable to interact with p110 $\beta$ , but instead RAC1 and CDC42 from the RHO subfamily of small GTPases bind and activate p110 $\beta$  via its RBD. In fibroblasts, GPCRs couple to PI3K through Dock180/Elmo1-mediated RAC activation and subsequent interaction with p110 $\beta$ . Cells from mice carrying mutations in the p110 $\beta$  RBD show reduced PI3K activity and defective chemotaxis, and these mice are resistant to experimental lung fibrosis. These findings revise our understanding of the regulation of type I PI3K by showing that both RAS and RHO family GTPases directly regulate distinct ubiquitous PI3K isoforms and that RAC activates p110 $\beta$  downstream of GPCRs.

## INTRODUCTION

The type I phosphoinositide 3-kinases (PI3Ks) are critical signaling proteins involved in the regulation of cell growth, survival, motility, and metabolism. In mammals, there exist four isoforms of the type I PI3K catalytic p110 subunits:  $\alpha$ ,  $\beta$ ,  $\gamma$ , and  $\delta$ . Of these,  $\alpha$  and  $\beta$  are ubiquitously expressed, whereas  $\gamma$  and  $\delta$  have more limited distribution, most notably in hematopoietic cells (Vanhaesebroeck et al., 2010). The lipid kinase activity of p110 $\alpha$  is regulated downstream of receptor tyrosine kinases by the binding of tyrosine-phosphorylated proteins to its regulatory

p85 subunit, resulting in attenuation of its autoinhibitory activity. In addition, activated RAS proteins bind directly to an N-terminal RAS-binding domain (RBD) on p110 $\alpha$ , acting synergistically with the input from tyrosine-phosphorylated proteins to optimally activate lipid kinase activity (Rodriguez-Viciana et al., 1994, 1996). Proof of the pathophysiological importance of the direct interaction of RAS with p110 $\alpha$  came from the generation of mice bearing germline mutations in the RBD of p110 $\alpha$ , which were found to be highly resistant to mutant-RAS-induced lung and skin cancer formation (Gupta et al., 2007).

The direct binding of RAS to p110 $\gamma$  has also been studied in detail. The 3D structure of RAS bound to p110 $\gamma$  has been determined, and RAS has been shown to activate the lipid kinase activity of p110 $\gamma$  cooperatively with input from G $\beta\gamma$  subunits via the regulatory p101 subunit (Pacold et al., 2000). Mice with mutations in the RBD of p110 $\gamma$  show neutrophil defects in the regulation of PI3K activity by some G-protein-coupled receptors (GPCRs) (Suire et al., 2006). RAS also has been reported to bind and activate p110 $\delta$  in vitro (Vanhaesebroeck et al., 1997). In addition, RBD mutations have been used to demonstrate that input of RAS binding to the single *Drosophila* type I PI3K is critical in insulin-pathway-controlled developmental growth (Orme et al., 2006) and that RAS binding is required for PI3K activation by chemoattractants in *Dictyostelium* (Funamoto et al., 2002).

p110 $\beta$  has been much less thoroughly studied than p110 $\alpha$ . It appears to be relatively insensitive to activation by growth factor receptor tyrosine kinase signaling but important downstream of certain GPCRs, including those for lysophosphatidic acid (LPA) and sphingosine 1-phosphate (S1P), making p110 $\beta$  the only GPCR-regulated type I PI3K isoform outside the hematopoietic system (Ciraolo et al., 2008; Guillermet-Guibert et al., 2008; Jia et al., 2008). p110 $\beta$  may also play an important role in cancer because mouse models of breast and prostate cancer, as well as a number of human cancer cell lines, depend on p110 $\beta$ , particularly in the setting of PTEN loss (Ciraolo et al., 2008; Jia et al., 2008). In platelets, p110 $\beta$  is essential for integrin-dependent adhesion and clot formation (Jackson et al., 2005; Martin

et al., 2010), leading to the intense effort to develop isoform-specific p110 $\beta$  inhibitors, some of which are now in clinical trials as antiplatelet and anticancer agents (NCT01458067, NCT00688714).

The molecular basis of how p110 $\beta$  can exert these distinct functions is poorly understood. p110 $\beta$  is overall structurally similar to other p110 catalytic subunits and engages the very same p85 type regulatory subunits as p110 $\alpha$ , albeit in a somewhat different way (Zhang et al., 2011). Early reports have found p110 $\beta$  to associate with G $\beta\gamma$  subunits from heterotrimeric G proteins, which can directly stimulate its lipid kinase activity in vitro (Kurosu et al., 1997; Maier et al., 1999). It has, however, remained entirely unclear whether the p110 $\beta$  RBD contributes to p110 $\beta$  activation and function, and despite the apparently similar level of relatedness between the RBDs across the four isoforms, a systematic analysis of RAS effector proteins failed to detect any activation of p110 $\beta$  by RAS in cotransfected cells (Rodriguez-Viciano et al., 2004).

In this report, we explore the role of p110 $\beta$  regulation through its RBD for PI3K signaling and function. We present extensive in vitro work to show that p110 $\beta$  is the only type I PI3K isoform not regulated by RAS and to identify the RHO family GTPases RAC and CDC42 as direct isoform-specific RBD interactors and activators of p110 $\beta$ . We go on to show that GPCRs couple to PI3K via Dock180/Elmo1-mediated RAC activation and subsequent interaction with p110 $\beta$ . Mouse embryonic fibroblasts (MEFs) from p110 $\beta$  RBD mutant mice show reduced PI3K activity and mice are resistant to bleomycin-induced lung fibrosis, a pathology that has been linked with LPA signaling. These findings explain longstanding inconsistencies and revise our understanding of type I PI3K regulation by small GTP-binding proteins, providing molecular insight into the regulation and function of the ubiquitous p110 $\beta$  isoform.

## RESULTS

### PI3K p110 $\beta$ Is Not a RAS Target Protein

To investigate the role of RAS in regulating p110 $\beta$ , we set out to characterize the biochemical interaction between the two in vitro. In glutathione S-transferase (GST) pull-down studies using recombinant, GTP $\gamma$ S-loaded HRAS, KRAS, and NRAS as baits, we found strong and specific interaction between all three RAS proteins and p110 $\alpha$  (Figure 1A). In contrast, p110 $\beta$  bound to none of the RAS proteins, but did bind to RAB5, a previously identified GTPase interactor of p110 $\beta$  (Christoforidis et al., 1999). Mutating key residues within the RBD of p110 $\alpha$  (T208D/K227A) abrogated RAS binding, whereas introduction of analogous mutations (see below for details) into p110 $\beta$  did not affect RAB5 binding. Similar results were obtained when we used recombinant full-length GST-p110/p85 complexes to pull down active RAS or RAB5 proteins (Figure 1B). Moreover, when we expressed constitutively active RAS or RAB5, along with p110 $\alpha$ /p85 or p110 $\beta$ /p85 in COS7 cells, and measured PIP $_3$ -levels (Figure 1C) or steady-state phospho-AKT (Figure S1A available online) as indicators of PI3K activity, HRAS and KRAS strongly enhanced p110 $\alpha$  activity, whereas p110 $\beta$  was not stimulated by either RAS proteins or RAB5.

### An Intact RBD Is Essential for p110 $\beta$ Activity in Cells

The modest RBD sequence similarity among the four paralogs of type I PI3K is shown in Figure 1D. Even though the overall structural organization of the p110 $\beta$  RBD is conserved (Zhang et al., 2011), we speculated that because we cannot detect any interaction with RAS, it might have lost or altered its function. We therefore mutated two highly conserved key residues within the p110 $\beta$  RBD to generate a p110 $\beta$ -S205D/K224A double mutant (p110 $\beta$ -RBD-DM; Figure 1E). Analogous mutations in p110 $\alpha$  and p110 $\gamma$  disrupt RAS binding (Gupta et al., 2007; Pacold et al., 2000). In vitro, the basal lipid kinase activity of purified recombinant p110 $\beta$ -RBD-DM protein was indistinguishable from its wild-type counterpart prepared in parallel (Figure 1F). Moreover, p110 $\beta$ -RBD-DM was still stimulated by the addition of purified recombinant G $\beta\gamma$  subunits, alone or in combination with a platelet-derived growth factor receptor (PDGFR)-derived phosphotyrosine peptide (pY740), indicating that the RBD mutations had no intrinsic effect on p110 $\beta$  lipid kinase activity or RBD-independent stimulatory input (Figure 1G). However, RBD mutant p110 $\beta$  was much less active than wild-type when expressed in COS7 cells (Figures 1H and S1B) even when G $\beta\gamma$  subunits were coexpressed or a myristoylation signal was added, pointing to a critical role of the RBD for p110 $\beta$  activity in living cells.

### p110 $\beta$ Interacts with Distinct RAS Subfamily GTPases

To identify RBD interactors of p110 $\beta$ , we probed all 34 murine members of the RAS subfamily of small GTPases (RFGs) for binding to p110 $\beta$ /p85 (Figure S1C). Parallel experiments were performed with p110 $\alpha$ /p85, p110 $\gamma$ /p101, and p110 $\delta$ /p85, respectively (Figure S1D). Strikingly, whereas all non- $\beta$  isoforms interacted with the three prototypical RAS proteins and a partially overlapping subset of closely related RFGs (RRAS1, RRAS2, MRAS, and ERAS), p110 $\beta$  bound to none of those (Figure 2A). Instead, p110 $\beta$  exclusively bound to the more distantly related DIRAS1 and DIRAS2 proteins in a GTP-dependent manner (Figure S1C). DIRAS selectively bound wild-type and not RBD mutant p110 $\beta$  (Figure S2B), suggesting binding to the RBD. However, DIRAS failed to stimulate p110 $\beta$  lipid kinase activity in vitro (Figure 2C) and in cells, where constitutively active DIRAS proteins seemed to repress rather than elevate phospho-AKT when coexpressed along with p110 $\beta$  (Figure 2B), making DIRAS an unlikely in vivo activator of p110 $\beta$ .

### p110 $\beta$ Is a Direct RAC/CDC42 Target Protein

When comparing DIRAS with RAS, an obvious difference is the substitution of Asp33 within the G2 box of RAS with Ile37 in DIRAS (Figure 2D). This substitution is relevant to PI3K binding because an HRAS-D33I mutant showed attenuated binding to p110 $\alpha$  and DIRAS1-I37D showed reduced binding to p110 $\beta$ , even though exchange of this residue did not enable RAS binding to p110 $\beta$  or DIRAS binding to p110 $\alpha$  (Figure S2A), pointing to additional, G2-box-independent determinants of PI3K isoform specificity. Several members of the RHO subfamily of small GTPases harbor a hydrophobic isoleucine or valine residue in this position (Figure S2C), which prompted us to test p110 $\beta$  for binding to representative RHO family GTPases (Figure S2D). Surprisingly, p110 $\beta$  bound to both RAC1 and CDC42 in a GTP-dependent manner. Weaker binding to RHOG and minimal

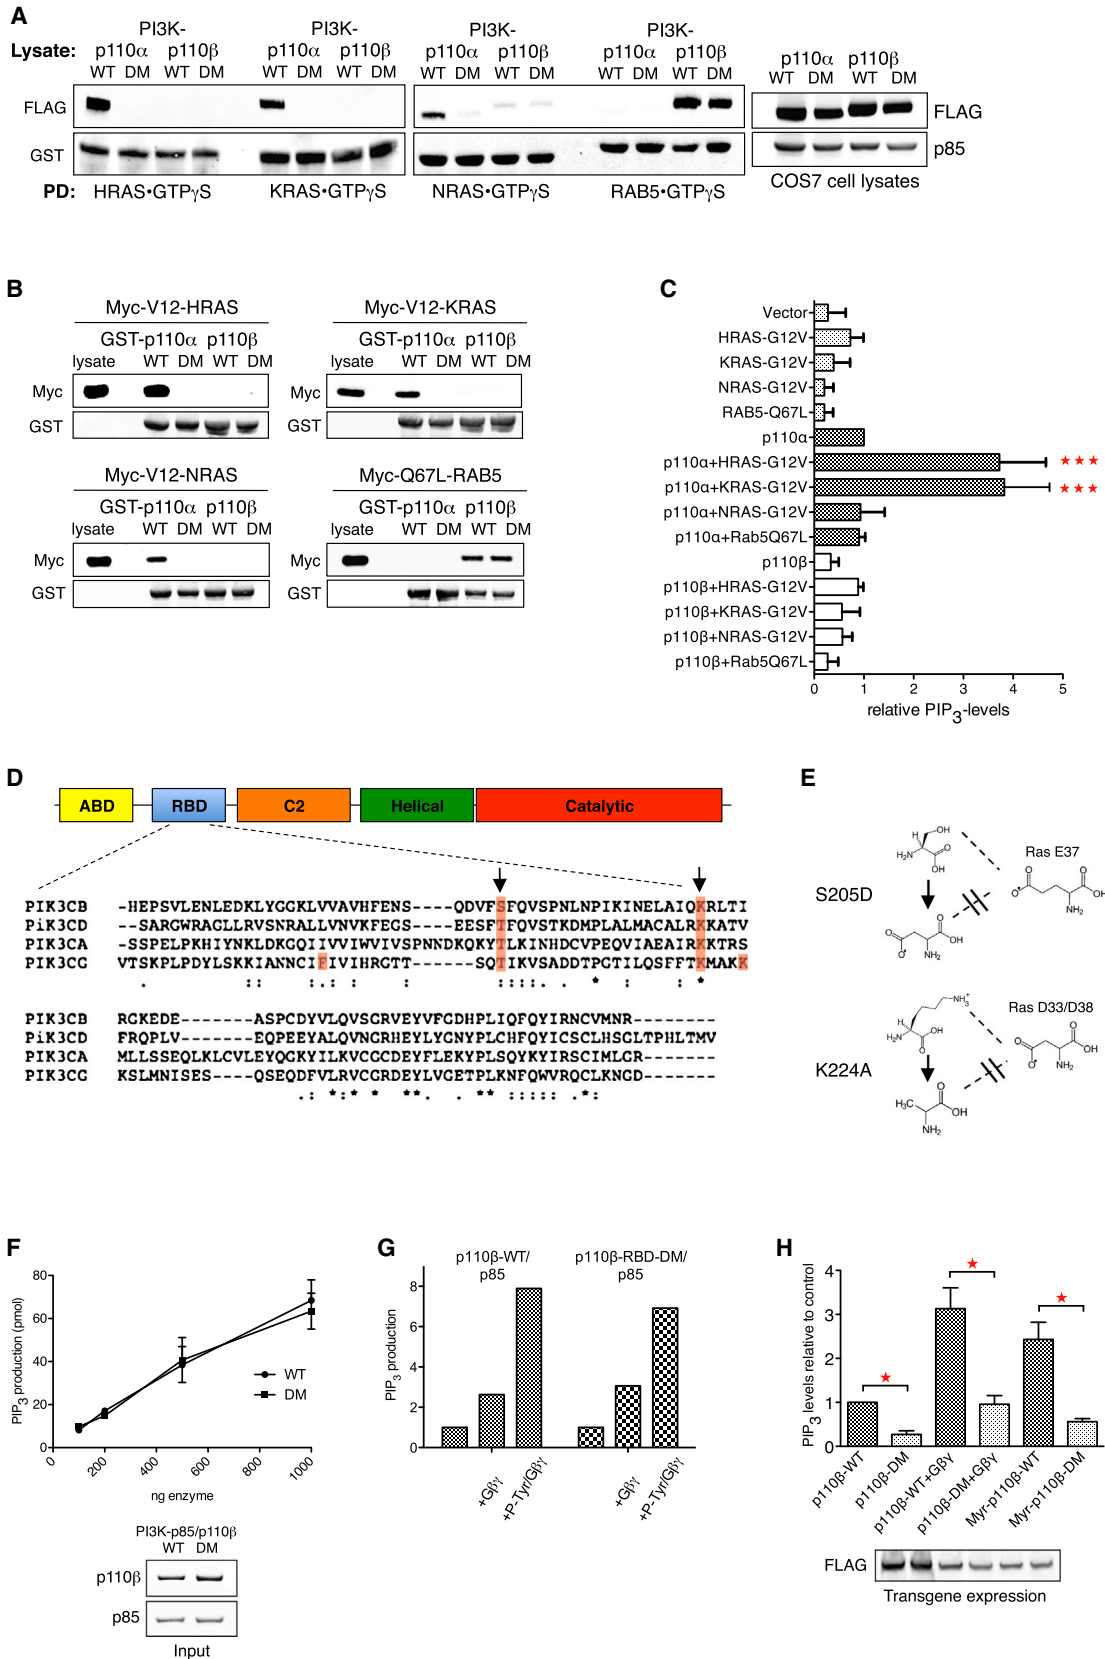

(legend on next page)

binding to RHOA was also observed (Figure 2E). Importantly, RAC1, CDC42, RHOG, and RHOA preparations bound similar amounts of GTP, indicating proper folding and functionality (Figure 2E, right lower graph), and a RAC1-I33D mutant showed reduced binding to p110 $\beta$  (Figure S2E), confirming a key role of this residue in GTPase binding to p110 $\beta$ .

The RAC1/CDC42-p110 $\beta$  interaction was isoform specific because neither RAC1 nor CDC42 significantly bound non- $\beta$  isoforms under parallel conditions (Figures 2F and S2F). Strikingly, GTP $\gamma$ S-loaded RAC1 or CDC42 strongly stimulated p110 $\beta$  lipid kinase activity in vitro (Figure 2G), alone and in cooperation with a phosphotyrosine peptide (pY740), or when p110 $\beta$  was complexed with a less inhibitory, truncated p85 ( $\Delta$ p85 schematic in Figure 3C). Stimulation of p110 $\beta$  by active RAC1 and CDC42 was dose dependent (Figure 2H). Coexpression of constitutively active RAC1 or CDC42 (Figure S2G, lanes 4–6), but not RHOA (Figure S2H), along with p110 $\beta$ /p85 in COS7 cells strongly elevated cellular phospho-AKT and PIP $_3$  levels (Figure 2I), indicating that both GTPases activate p110 $\beta$  in transfected cells. PIP $_3$  levels were further enhanced by coexpression of G $\beta$  $_1$ /G $\gamma$  $_2$  subunits or by myristoylation of p110 $\beta$  (Figure 2I). In contrast, GTP $\gamma$ S-loaded RAC1/CDC42 did not stimulate p110 $\alpha$  in vitro (Figure S2I), nor did V12-RAC1/CDC42 cooperate with p110 $\alpha$ , p110 $\gamma$ , or p110 $\delta$  to elevate cellular phospho-AKT levels (Figure S2J). Taken together, these data show that the RHO family GTPases RAC1 and CDC42 bind to p110 $\beta$  in an isoform-specific manner and potently and directly stimulate its lipid kinase activity.

### RAC and CDC42 Are RBD Interactors of p110 $\beta$

We next aimed to confirm that RAC and CDC42 are RBD interactors of p110 $\beta$ . Purified recombinant wild-type p110 $\beta$ /p85 bound to RAC1 and CDC42 in a concentration-dependent manner, whereas p110 $\beta$ -RBD-DM/p85 complexes showed no binding (Figure 3A). Similarly, RBD mutant p110 $\beta$  was not stimulated by active RAC1 or CDC42 in vitro (Figure 3B) or in cells (Figure S2E, lanes 7–9). To test whether the BCR homology domain (BHD) on p85, which had previously been shown to bind RAC and CDC42 (Bokoch et al., 1996; Zheng et al., 1994), is required for RAC/CDC42 binding to p110 $\beta$ , we truncated p85 ( $\Delta$ p85 schematic in Figure 3C) and probed for binding of p110 $\beta$ / $\Delta$ p85 to

RAC1 and CDC42 in vitro. Intriguingly, binding was unaffected by removal of the BHD but completely disrupted when full-length p85 was in complex with RBD mutant p110 $\beta$ , strongly arguing for the RBD as the RAC/CDC42-binding site. To further corroborate these findings, we generated 43 single point mutations covering 37 residues across the p110 $\beta$  RBD and assayed these mutants for binding to RAC1 and CDC42 (Figures 3D, S3A, and S3B). Of those, 17 mutations of 14 RBD residues affected binding to both GTPases without affecting p110 $\beta$  protein stability. Several of these residues were part of the RBD $\beta$ 1 and  $\beta$ 2 sheets or the loop adjacent to the RBD $\alpha$ 1 helix (Zhang et al., 2011), areas known to be important for RAS binding in non- $\beta$  isoforms (Pacold et al., 2000). Finally, we employed isothermal titration calorimetry (ITC) to study thermodynamics of the RAC1/CDC42-p110 $\beta$  interaction. In solution, RAC1 $\cdot$ GTP $\gamma$ S bound to p110 $\beta$ / $\Delta$ p85 with a molar ratio close to 1 and an average  $K_d$  of 1.42  $\mu$ M, whereas the affinity measured for CDC42 $\cdot$ GTP $\gamma$ S was 3.1  $\mu$ M (Figures 3E and 3F). Similar affinities have been reported for the RAS-p110 $\alpha$  and RAS-p110 $\gamma$  interactions (Pacold et al., 2000; Rodriguez-Viciana et al., 1996), indicating that RAC1 and CDC42 are plausible RBD interactors of p110 $\beta$ . No binding was observed between GTP $\gamma$ S-loaded RAC1/CDC42 and p110 $\alpha$  or p110 $\beta$ -RBD-DM, respectively (Figure S3C).

### p110 $\beta$ -RBD-DM Mice Show Signs of Reduced PI3K Activity

To study the role of interactor binding to the p110 $\beta$  RBD for PI3K signaling in vivo, we generated mice harboring the two p110 $\beta$  RBD point mutations (S205D/K224A) within their germline. Homologous recombination in embryonic stem (ES) cells was employed to replace exon 6 of the murine *Pik3cb* gene (Figure S4A), and germline transmission was achieved by eight-cell embryo injection (Figures S4B and S4C). p110 $\beta$ -RBD-DM mice were viable and fertile, although numbers of homozygous animals at the time of biopsy (around day 14) were moderately reduced (73 where 105 were expected;  $p < 0.02$ ; Figure 4A), indicating incomplete lethality for undetermined reasons. Newborn homozygous p110 $\beta$ -RBD-DM pups were smaller than their wild-type littermates (Figure 4B). The size difference in adult mice was subtle but remained significant when same-sex

### Figure 1. PI 3-Kinase p110 $\beta$ Is Unable to Interact with RAS

- (A) p110 $\beta$  does not bind to GTP-loaded RAS proteins. Purified recombinant, GTP $\gamma$ S-loaded HRAS, KRAS, NRAS, and RAB5 were incubated with lysates from COS7 cells expressing FLAG-p110 $\alpha$ /p85 or FLAG-p110 $\beta$ /p85, wild-type (WT), or RBD double mutant (DM).
- (B) Active RAS proteins do not bind to immobilized p110 $\beta$ /p85. Purified recombinant GST-p110 $\alpha$ /p85 and GST-p110 $\beta$ /p85 were incubated with lysates from COS7 cells expressing Myc-tagged, constitutively active HRAS, KRAS, NRAS, and RAB5.
- (C) Active RAS proteins do not stimulate p110 $\beta$  in cells. Lipids were extracted and PIP $_3$  levels measured from COS7 cells expressing constitutively active mutants of HRAS, KRAS, NRAS, and RAB5, alone or in combination with p110 $\alpha$ /p85 or p110 $\beta$ /p85 ( $n = 3$ ; mean with SD; one-way ANOVA).
- (D) Type I PI3K RBDs show moderate sequence similarity. Alignment of amino acid sequences of all four type I PI3K RBDs (PIK3CB = p110 $\beta$ , PIK3CD = p110 $\delta$ , PIK3CA = p110 $\alpha$ , PIK3CG = p110 $\gamma$ ). Orange represents RAS-binding residues in p110 $\gamma$ , and arrows represent conserved "RAS-binding" residues.
- (E) Mutation of RBD key residues in p110 $\beta$ . The two point mutations are shown together with hypothetical interactor residues modeled on the RAS-p110 $\gamma$  interaction.
- (F) Unaltered lipid kinase activity of recombinant p110 $\beta$ -RBD-DM protein. Lipid kinase assay assessing basal activities of purified recombinant p110 $\beta$ /p85 complexes ( $n = 3$ ; mean with SEM).
- (G) p110 $\beta$ -RBD-DM protein remains sensitive to G $\beta$  $\gamma$  and phosphotyrosine. A representative lipid kinase assay assessing effect of recombinant G $\beta$  $\gamma$  and a PDGFR-derived phosphotyrosine peptide (pY740) on the activity of purified recombinant p85/p110 $\beta$ -WT and p85/p110 $\beta$ -RBD-DM is shown.
- (H) Activity of p110 $\beta$ -RBD-DM in living cells is reduced. Lipids were extracted and PIP $_3$  levels measured from COS7 cells expressing wild-type or RBD mutant p110 $\beta$ /p85. G $\beta$  $\gamma$ , coexpression of G $\beta$  $_2$  and G $\gamma$  $_1$ ; Myr, myristoylated p110 $\beta$  ( $n = 3$ ; mean with SEM; paired t test).

See also Figure S1.



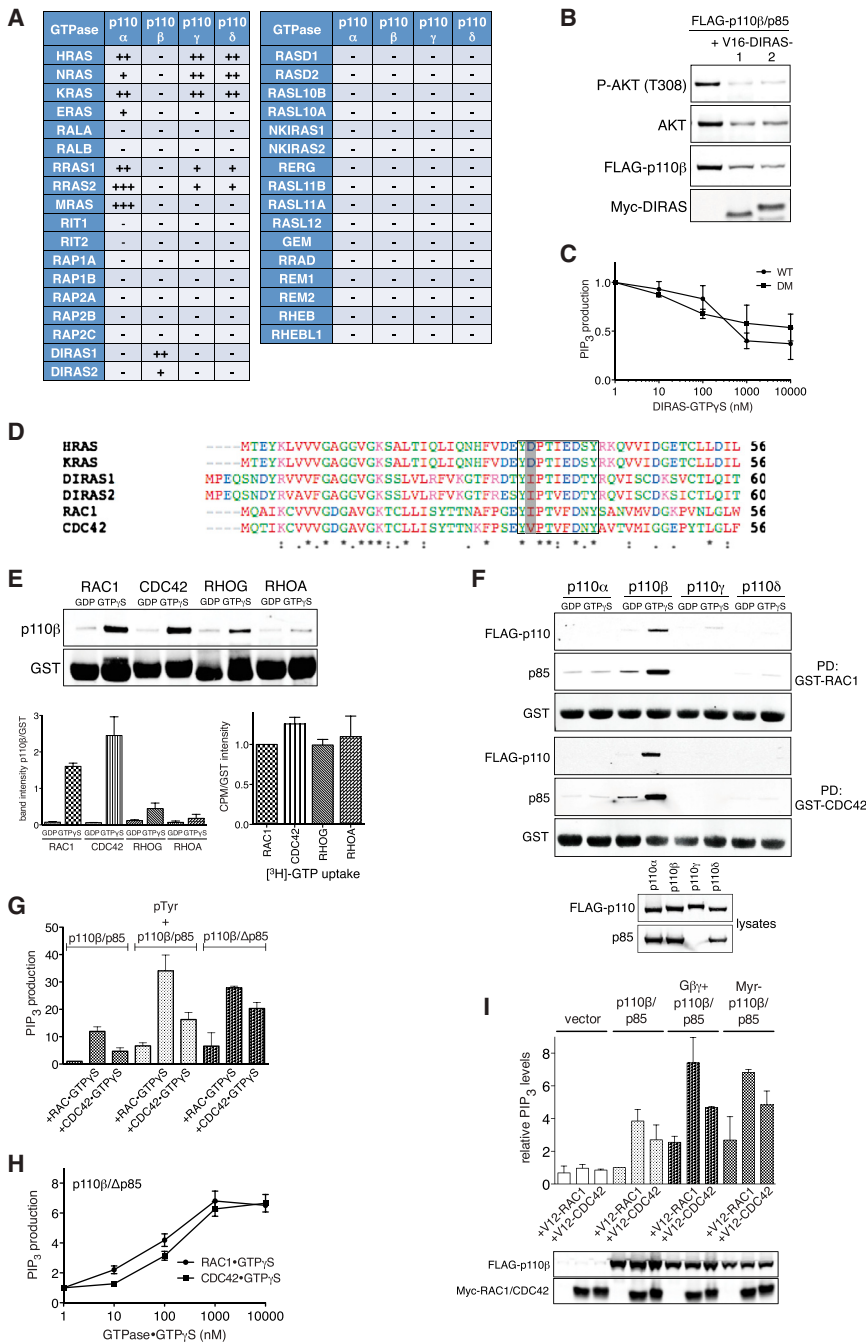

**Figure 2. RAC and CDC42 Directly Bind and Active p110 $\beta$**

(A) p110 $\beta$  interacts with distinct RAS subfamily GTPases to non- $\beta$  isoforms. Table summarizes results from GST pull-down assays (Figures S1C and S1D) probing 34 murine RAS subfamily GTPases for GTP-dependent binding of type I PI3K isoforms (-, no binding; +, specific binding; ++, strong binding; +++, very strong binding). (B) DIRAS1/2 do not stimulate p110 $\beta$  in cells. Constitutively active DIRAS1 or DIRAS2 were coexpressed with FLAG-p110 $\beta$ /p85 in COS7 cells. (C) DIRAS does not stimulate p110 $\beta$  lipid kinase activity in vitro. Shown is a lipid kinase assay assessing the effect of purified recombinant, GTP $\gamma$ S-loaded DIRAS1 on p85/p110 $\beta$  (WT) and p85/p110 $\beta$ -RBD-DM (DM) activity (n = 3; mean with SEM).

(D) G2 box sequences of H-/KRAS, DIRAS1/2 and RAC1/CDC42. Color-coded amino acid sequence alignment of the N termini of indicated small GTPases. A square frame highlights the G2 box sequence, and the variant residue (D33 in RAS) is shown in gray.

(E) RHO GTPases directly bind p110 $\beta$  in a GTP-dependent manner. Purified recombinant, GDP/GTP $\gamma$ S-loaded RHO GTPases were incubated with purified recombinant p110 $\beta$ /p85 (50 nM). Top: representative experiment; left: quantification (n = 2; mean with SEM); right: <sup>3</sup>[H]-GTP uptake of GTPase preparations (n = 2; mean with SEM).

(F) Binding of p110 $\beta$  to RAC1 and CDC42 is isoform specific. Purified recombinant GDP/GTP $\gamma$ S-loaded RAC1 and CDC42 were incubated with lysates from COS7 cells expressing FLAG-tagged p110 $\alpha$ /p85, p110 $\beta$ /p85, p110 $\gamma$ /p101, and p110 $\delta$ /p85.

(G) RAC1 and CDC42 directly stimulate p110 $\beta$  lipid kinase activity. Purified recombinant GTP $\gamma$ S-loaded RAC1/CDC42 (1  $\mu$ M) were added to purified recombinant p110 $\beta$ /p85, and lipid kinase activity was assessed in vitro. pTyr, phosphotyrosine peptide (pY740, 10  $\mu$ M);  $\Delta$ p85, truncated p85, schematic in Figure 3C (n = 2; mean with SD).

(H) RAC1 and CDC42 dose-dependently stimulate p110 $\beta$  lipid kinase activity. Increasing concentrations of purified recombinant GTP $\gamma$ S-loaded RAC1/CDC42 were added to purified recombinant p110 $\beta$ /p85, and lipid kinase activity was assessed in vitro (n = 3; mean with SEM).

(I) RAC1 and CDC42 activate p110 $\beta$  in cells. Lipids were extracted and PIP<sub>3</sub> levels measured from COS7 cells expressing constitutively active RAC1 or CDC42, alone or in combination with FLAG-p110 $\beta$ /p85. G $\beta$  $\gamma$ , coexpression of G $\beta$ <sub>2</sub> and G $\gamma$ <sub>1</sub>; Myr, myristoylated p110 $\beta$  (n = 2; mean with SD). Western blots show expression levels of FLAG-p110 $\beta$  and Myc-tagged GTPases.

See also Figure S2.

litter- and cage-mates were compared (Figure 4C). MEFs homozygous for the p110 $\beta$  RBD mutation proliferated at a significantly slower rate than their wild-type counterparts (Figure 4D), which was reflected by a higher percentage of cells in G1 (1% fetal calf serum [FCS]: 56.7%  $\pm$  0.32% versus 64.2%  $\pm$  0.53%, n = 4, p < 0.001; 10% FCS: 47.5%  $\pm$  3.0% versus 52.2%  $\pm$  3.9%, n = 4, p < 0.05), fewer cells in G2 (1% FCS: 24.5%  $\pm$  1.4% versus

21.0%  $\pm$  1.9%, n = 4, p < 0.05; 10% FCS: 23.9%  $\pm$  1.4% versus 21.1%  $\pm$  1.6%, n = 4, p < 0.05) and fewer cells in S phase for 1% FCS (1% FCS: 13.3%  $\pm$  1.0% versus 11.0%  $\pm$  1.6%, n = 4, p < 0.05) (Figure 4E). Moreover, p110 $\beta$ -RBD-DM MEFs showed lower steady-state phospho-AKT levels (Figure 4F), suggesting that stimulatory signaling to p110 $\beta$  via its RBD contributes to PI3K activity in vivo. Expression levels of p110 $\beta$ , p110 $\alpha$ , and



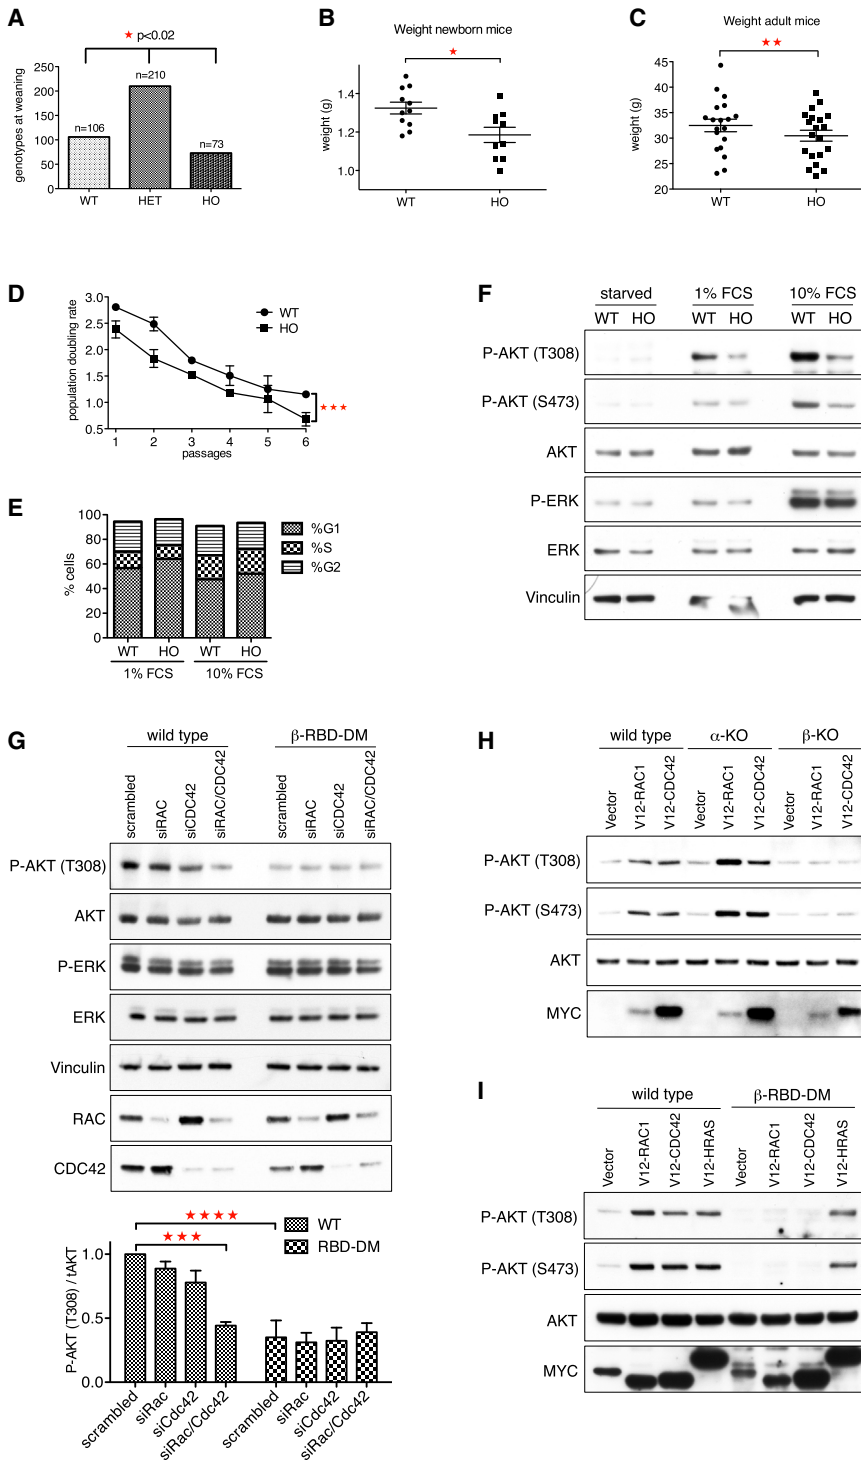

**Figure 4. RAC/CDC42 Binding to p110β Regulates PI3K Activity In Vivo**

(A) Reduced numbers of homozygous p110β-RBD-DM mice. Offspring from HET × HET crosses was genotyped at 2 weeks of age (n = 389; p < 0.02, chi-square analysis).

(B) Newborn p110β-RBD-DM pups are smaller. Newborn pups from HET × HET crosses were collected on the morning of birth, weighed, and genotyped (n = 31; mean ± SEM; p = 0.011, t test).

(C) Adult p110β-RBD-DM mice are smaller than their wild-type littermates. Weights of adult homozygous p110β-RBD-DM mice (12–30 weeks old) were compared to same-cage wild-type littermates (n = 39; mean ± SEM; paired t test).

(D) Reduced proliferation of p110β-RBD-DM MEFs. Early passage primary MEFs were grown in culture following a modified 3T3 protocol (n = 2 per genotype). Population doubling rate was calculated as  $PDR = \log(n(\text{day } 3)/n(\text{seeded}))/\log 2$  (mean ± SEM; p < 0.001, two-way ANOVA).

(E) Accumulation of p110β-RBD-DM cells in G1. Cell-cycle profiles of early passage wild-type and homozygous p110β-RBD-DM primary MEFs growing in 1% or 10% FCS (n = 4, means; SEM in the Results section).

(F) p110β-RBD-DM MEFs show reduced steady-state phospho-AKT levels. Wild-type and p110β-RBD-DM MEFs were maintained in cell culture medium supplemented with 0%, 1%, or 10% FCS and harvested for western blot analysis.

(G) RAC1 and CDC42 cooperatively sustain phospho-AKT levels in wild-type MEFs. Wild-type and p110β-RBD-DM MEFs were transfected with scrambled duplex or gene-specific siRNA pools targeting RAC1, CDC42, or both and harvested for western blot analysis 30 hr after transfection. Graph shows phospho-AKT normalized to total AKT (n = 3; mean with SEM, one-way ANOVA).

(H) RAC1 and CDC42 activate p110β in vivo. Myc-V12-RAC1 and Myc-V12-CDC42 were nucleofected into immortalized wild-type, p110α-knockout, and p110β-knockout MEFs, along with a kinase-dead AKT reporter construct. The next day, cells were serum starved and harvested for western blot.

(I) RAC and CDC42 fail to activate PI3K in p110β-RBD-DM cells. Myc-V12-RAC1, Myc-V12-CDC42, or Myc-V12-HRAS were nucleofected into wild-type and p110β-RBD-DM MEFs as described in (H).

See also Figure S4.

**Activation of p110β Downstream of GPCRs Requires an Intact RBD**

To study whether the p110β RBD is required for coupling p110β to GPCRs, we stimulated wild-type and p110β-RBD-DM MEFs with the lipid growth factors and GPCR agonists LPA and S1P.

GPCR involvement. In p110β-RBD-DM MEFs, LPA- and S1P-induced phosphorylation of AKT was strongly diminished, whereas ERK phosphorylation was undisturbed (Figures 5A and S5A). Also, in time course experiments, AKT phosphorylation was more transient when the p110β RBD was mutated

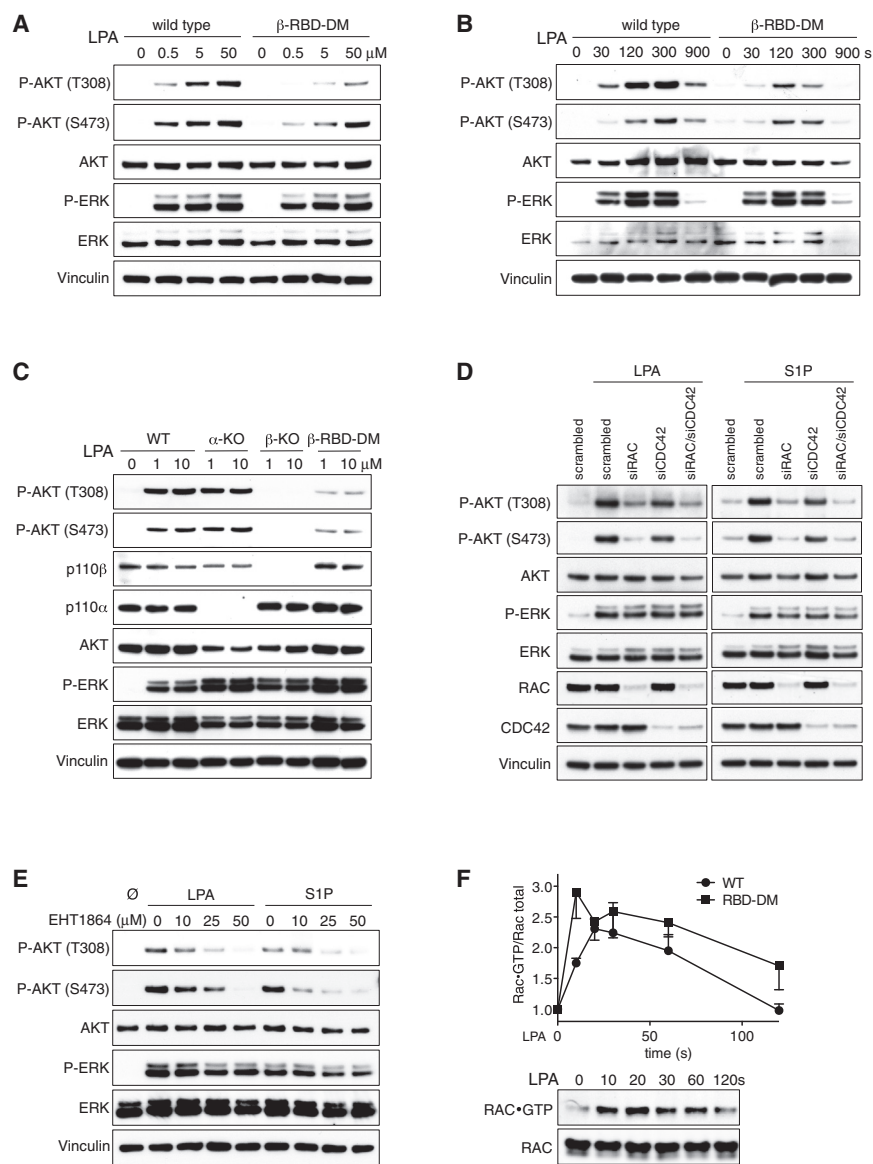

**Figure 5. RAC Activates p110 $\beta$  Downstream of GPCRs**

(A) LPA-induced AKT phosphorylation is attenuated in p110 $\beta$ -RBD-DM MEFs. Primary wild-type and homozygous p110 $\beta$ -RBD-DM MEFs were serum starved and stimulated with LPA for 5 min. (B) LPA-induced AKT phosphorylation is more transient in p110 $\beta$ -RBD-DM MEFs. Primary wild-type and p110 $\beta$ -RBD-DM MEFs were serum starved and stimulated with LPA (10  $\mu$ M) for indicated time periods.

(C) LPA-induced AKT phosphorylation is entirely dependent on p110 $\beta$ . Immortalized wild-type, p110 $\alpha$ -knockout, p110 $\beta$ -knockout, and p110 $\beta$ -RBD-DM MEFs were serum starved and stimulated with indicated doses of LPA for 5 min.

(D) LPA-/S1P-induced AKT phosphorylation requires RAC. Immortalized wild-type MEFs were transfected with scrambled duplex or gene-specific siRNA pools targeting RAC1, CDC42 or both. Serum-starved cells were stimulated with LPA (10  $\mu$ M) or S1P (1  $\mu$ M) for 5 min.

(E) LPA-/S1P-induced AKT phosphorylation requires RAC activity.

Immortalized wild-type MEFs were serum starved, preincubated with EHT1864 for 30 min, and stimulated with LPA (10  $\mu$ M) or S1P (1  $\mu$ M) for 5 min.

(F) LPA induces rapid and transient activation of RAC. Serum-starved wild-type and p110 $\beta$ -RBD-DM MEFs were stimulated with LPA (10  $\mu$ M) for indicated periods of time. RAC $\cdot$ GTP and total RAC were measured as described in the [Extended Experimental Procedures](#) (n = 3; mean with SEM). See also [Figure S5](#).

(Figure 5B and not shown). In contrast, p110 $\beta$ -RBD-DM MEFs responded normally to epidermal growth factor (EGF), platelet-derived growth factor (PDGF), and insulin in dose-response (Figure S5C) and time course experiments (data not shown). Notably, in p110 $\beta$ -knockout cells, AKT phosphorylation in response to LPA was completely abolished (Figure 5C), indicating that the RBD is essential for much but not all p110 $\beta$  activation downstream of GPCRs.

#### Activation of p110 $\beta$ Downstream of GPCRs Requires RAC

To test whether the identified p110 $\beta$  RBD interactors are required for linking p110 $\beta$  to GPCRs, we knocked down RAC1 and CDC42 in wild-type MEFs. Knockdown of RAC1 strongly impacted LPA/S1P-induced AKT phosphorylation, knockdown of CDC42 had only minor effects, and combination knockdown

induced by tyrosine kinase receptor agonists (EGF, PDGF, and insulin; Figure S5E). Similarly, EHT1864, a direct inhibitor of RAC but not CDC42 activation, dose-dependently inhibited AKT phosphorylation induced by LPA/S1P (Figure 5E), but not EGF, PDGF, or insulin (Figure S5F). Therefore, acute loss or inhibition of RAC phenocopied the signaling defect observed in p110 $\beta$ -RBD-DM MEFs. In line with this, RAC was activated very rapidly upon LPA stimulation, reaching its peak activity within 20 s (Figure 5F).

#### Dock180/Elmo1 Activates RAC Downstream of GPCRs and Upstream of p110 $\beta$

To provide further mechanistic insight into the GPCR-RAC-p110 $\beta$  pathway, we performed a small candidate siRNA screen to identify the guanine nucleotide exchange factor (RAC-GEF) involved. Transfection of wild-type MEFs with siRNA pools



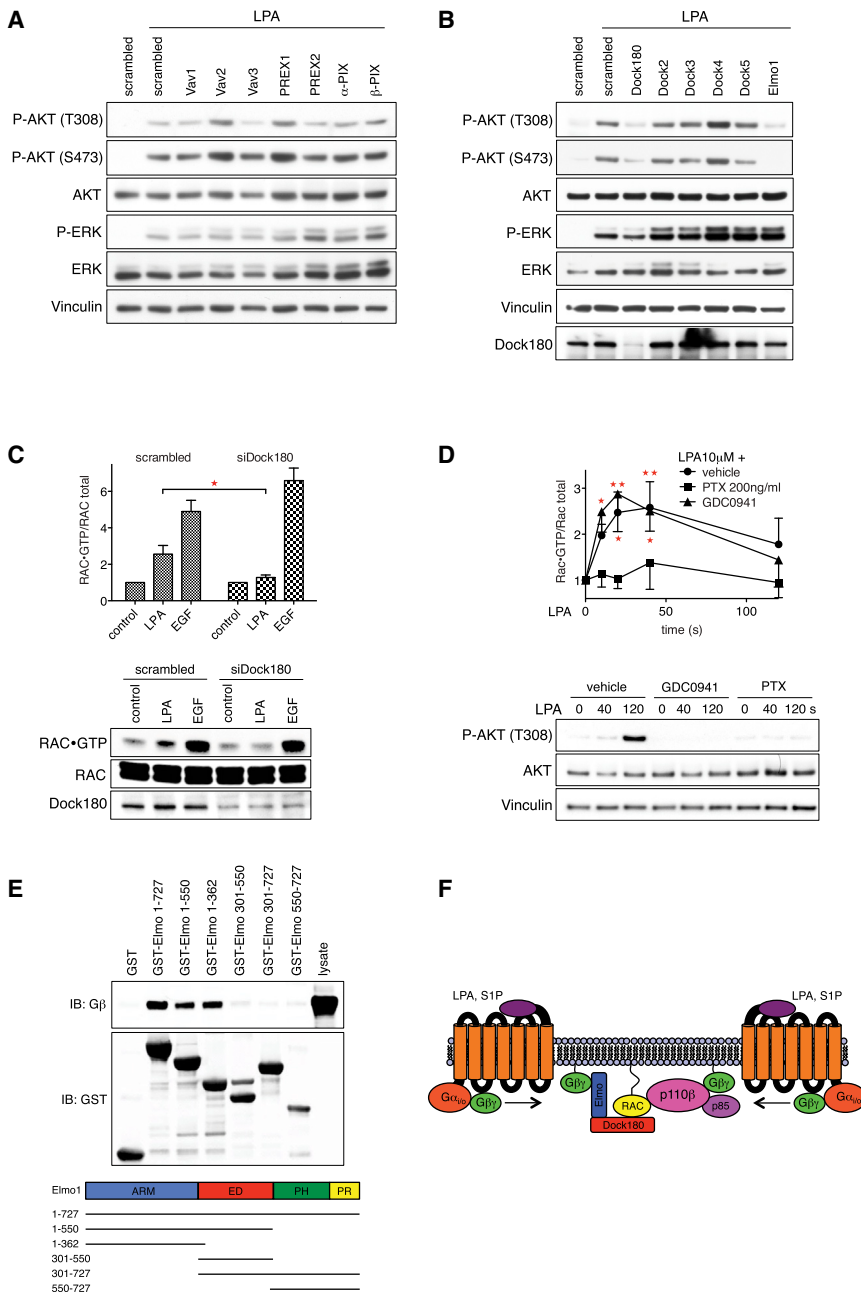

**Figure 6. Dock180/Elmo1 Activate RAC Downstream of GPCRs and Upstream of p110β**

(A) siRNA pools targeting Dbl family RAC-GEFs fail to affect LPA-induced AKT phosphorylation. Immortalized wild-type MEFs were transfected with scrambled duplex or gene-specific siRNA pools targeting indicated Dbl family RAC-GEFs. A total of 48 hr after transfection, serum-starved cells were stimulated with LPA (10 μM) for 5 min. (B) Dock180 and Elmo1 are essential for LPA-induced AKT phosphorylation. Immortalized wild-type MEFs were transfected with scrambled duplex or gene-specific siRNA pools targeting indicated Dock family RAC-GEFs. Then 48 hr after transfection, serum-starved cells were stimulated with LPA (10 μM) for 5 min.

(C) Dock180 is essential for LPA-induced RAC activation. Immortalized wild-type MEFs, transfected with scrambled duplex or Dock180-specific siRNA pools, were stimulated with LPA (10 μM) or EGF (10 ng/ml) for 20 s and active RAC was quantified (n = 4; mean with SEM; t test; bottom: a representative experiment).

(D) LPA-induced RAC activation is PI3K independent. Immortalized MEFs were preincubated with PTX (200 ng/ml, 16 hr) or GDC0941 (10 μM, 1 hr) and stimulated with LPA (10 μM) for the indicated time periods (n = 4; mean with SEM; one-way ANOVA; bottom: representative lysates).

(E) Gβγ subunits directly bind to the N terminus of Elmo1. GST-tagged full-length Elmo1 and fragments as shown (schematic) were incubated with lysates from COS7 cells expressing Gβ<sub>2</sub> and Gγ<sub>1</sub>. Bound Gβ was detected by western blot.

(F) Model of GPCR-induced p110β activation. See text for details.

See also Figure S6.

targeting the Dbl family RAC-GEFs Vav1-3, PREX1/2, and α-/β-PIX had no clear effect on LPA/S1P-induced AKT phosphorylation (Figures 6A and S6A). In contrast, knockdown of the Dock family RAC-GEF Dock180 or its adaptor protein Elmo1 interfered with AKT phosphorylation induced by LPA and S1P (Figure 6B and S6B), but not by EGF, PDGF, and insulin (Figure S6C). Specificity of results was confirmed in deconvolution experiments using individual siRNA oligonucleotides targeting Dock180 and Elmo1 (Figures S6D and S6E). Knockdown of Elmo2 had no effect (Figure S6F). Moreover, knockdown of Dock180 abolished LPA- but not EGF-induced RAC activation (Figure 6C), firmly

type I PI3K inhibitor, placing all detectable RAC activation upstream of p110β (Figure 6D). Recently, *Dictyostelium* ElmoE has been reported to be a direct Gβγ effector (Yan et al., 2012). We thus probed Gβγ subunits for direct binding to purified recombinant Elmo1 (Figure 6E) and found Gβγ to strongly bind to full-length Elmo1 and several N-terminal fragments. This altogether suggests a model in which Dock180 is recruited downstream of GPCRs, possibly through binding of Gβγ to the N terminus of Elmo1. At the same time, p110β is directly recruited by Gβγ. RAC is activated in proximity to p110β and binds to the RBD to fully activate p110β lipid kinase activity (schematic

in Figure 6F). We could not detect any tyrosine phosphorylation on p85 in response to LPA (Figure S6G), and the tyrosine kinase inhibitors dasatinib, erlotinib, and PP2 (all at 1  $\mu$ M) had no effect on the signaling pathway studied (data not shown).

### Disruption of the LPA-Dock180/Elmo1-RAC-p110 $\beta$ Axis Affects Fibroblast Chemotaxis

To assess the functional importance of the Dock180/Elmo1-RAC-p110 $\beta$  signaling axis for fibroblast chemotaxis, we employed transwell filter assays to study migration in gradients of LPA and PDGF. p110 $\beta$ -RBD-DM MEFs showed significantly reduced migration in LPA but not PDGF gradients (Figure 7A). Similarly, wild-type MEFs transfected with siRNA pools targeting Dock180, Elmo1, or RAC1 showed defective migration in gradients of LPA but not PDGF (Figure 7B), pointing to the specificity of this pathway for GPCR-induced chemotaxis. In contrast, PI3K activity was required for normal migration in either gradient, because pretreatment of wild-type cells with GDC0941 strongly affected migration toward LPA and PDGF, whereas pretreatment of cells with pertussis toxin selectively blocked migration in LPA gradients (Figure S7A).

In agreement with a key role of RAC upstream of p110 $\beta$  in fibroblast migration, acute expression of constitutively active RAC (V12-RAC1) stimulated migration of wild-type but not p110 $\beta$ -RBD-DM MEFs in the absence of chemoattractant and in the presence of a low concentration of LPA (10 nM) in the lower chamber, whereas migration toward 1% FCS was largely unaffected (Figure S7B).

### p110 $\beta$ -RBD-DM Mice Are Protected from Bleomycin-Induced Lung Fibrosis

LPA has been identified as important fibroblast chemoattractant in bleomycin-induced lung fibrosis, a well-studied mouse model of human fibrotic lung disease, and was found to be elevated in patients with idiopathic lung fibrosis (Tager et al., 2008). We therefore wondered whether the disruption of p110 $\beta$  activation by LPA in p110 $\beta$ -RBD-DM mice would be sufficient to affect experimental lung fibrosis. Following a single intratracheal application of bleomycin, a quarter of all wild-type animals died or had to be culled according to local animal welfare regulations, whereas all p110 $\beta$ -RBD-DM mice survived (Figure 7C). Also, wild-type but not p110 $\beta$ -RBD-DM mice significantly lost body weight (Figure 7D) upon bleomycin treatment. Lung weights increased in both groups, but to a significantly lesser extent in p110 $\beta$ -RBD-DM mice (Figure S7C). Histology of lungs 14 days after bleomycin challenge revealed extended areas of fibrotic changes in wild-type animals (Figure 7E, hematoxylin and eosin staining [H&E], top), characterized by accumulation of activated, smooth muscle antigen-positive fibroblasts (Figure 7E, middle) and deposition of crosslinked collagen fibers (Figure 7E, Sirius red, bottom). Changes in p110 $\beta$ -RBD-DM mice were milder, with some mice showing almost normal lungs and others showing more limited areas of fibrosis. Morphometric analysis of multiple nonoverlapping lung areas confirmed the differences between the genotypes: transparent lung areas were significantly reduced (Figures 7F and S7D) and SMA-positive areas significantly increased (Figure 7G and S7E) in wild-type but not p110 $\beta$ -RBD-DM mice when compared to saline controls.

## DISCUSSION

### RAS Proteins Do Not Regulate the Ubiquitous p110 $\beta$ Isoform

In this study, we show that, in contrast to what has been widely presumed, RAS is not a general regulator of type I PI3Ks. We find that out of the two ubiquitously expressed PI3K isoforms, only p110 $\alpha$  is regulated by RAS, whereas p110 $\beta$  is a direct RAC and CDC42 target protein, indicating that key members of the pivotal RAS and RHO families of small G proteins directly regulate type I PI3Ks, with each family controlling their own distinct ubiquitous p110 isoform.

That p110 $\beta$  proved unable to physically and functionally interact with RAS is unexpected given the presence of a moderately conserved PI3K-type RBD in all four type I PI3K p110 catalytic subunits (Pacold et al., 2000). Comparison between the published structures of the four RBDs in their interactor-free states reveals little pointing to the distinct interactor specificity of p110 $\beta$  (R. Chaleil and P. Bates, personal communication). p110 $\beta$  is not only unable to interact with RAS under conditions readily revealing the transient, low-affinity interactions of RAS with other isoforms, but it also has an entirely distinct RAS superfamily GTPase interactor profile with a subfamily switch from RAS to RHO at the core of it, making any, for whatever reason, undetectable interaction with RAS unlikely. RBDs, classified on grounds of a ubiquitin fold structure with interactor specificities distinct from RAS, are not uncommon, as exemplified by the human formin FHOD1, a RAC interactor (Schulte et al., 2008), or the N terminus of Elmo1, shown to bind RHOG and the ARF family member ARL4A (Patel et al., 2011).

### RAC and CDC42 Are Isoform-Specific RBD Interactors of p110 $\beta$

Our biochemical experimentation identifies RAC1 and CDC42 as RBD interactors of p110 $\beta$ . An association of PI3K with RAC and CDC42 was first noticed nearly 20 years ago (Tolias et al., 1995), but was attributed to RAC/CDC42 binding to the amino-terminal BHD on p85, which has sequence homology to RHO-GAP domains (Bokoch et al., 1996; Zheng et al., 1994). These studies left the epistasis of information transfer between RAC/CDC42 and PI3K unclear. In retrospect, all functional data from these studies can be explained by the presence of p110 $\beta$  in the cell lysates and PI3K preparations used. Only the reported binding of RAC and CDC42 to recombinant p85 remains puzzling. We did not study monomeric p85, which has not been found in living cells (Geering et al., 2007), but our biochemical data strongly argue against an involvement of p85 in the RAC/CDC42-p110 $\beta$  interaction, because (1) RAC1 and CDC42 do not interact with p110 $\alpha$ /p85 or p110 $\delta$ /p85, (2) RAC1 and CDC42 bind normally to p110 $\beta$  in the absence of the p85 BH domain, and (3) RBD point mutations abrogate RAC1 and CDC42 binding to p110 $\beta$  in complex with full-length p85. A body of literature has accumulated identifying RAC or CDC42 as essential upstream activators of PI3K in various systems (Keely et al., 1997; Srinivasan et al., 2003; Weiner et al., 2002), but straightforward analysis of the relationship between RHO family GTPases and PI3K has been difficult, mainly because RAC and CDC42 also act downstream of PI3K, activated through PIP<sub>3</sub>-dependent GEFs (Welch et al., 2003). A very recent study

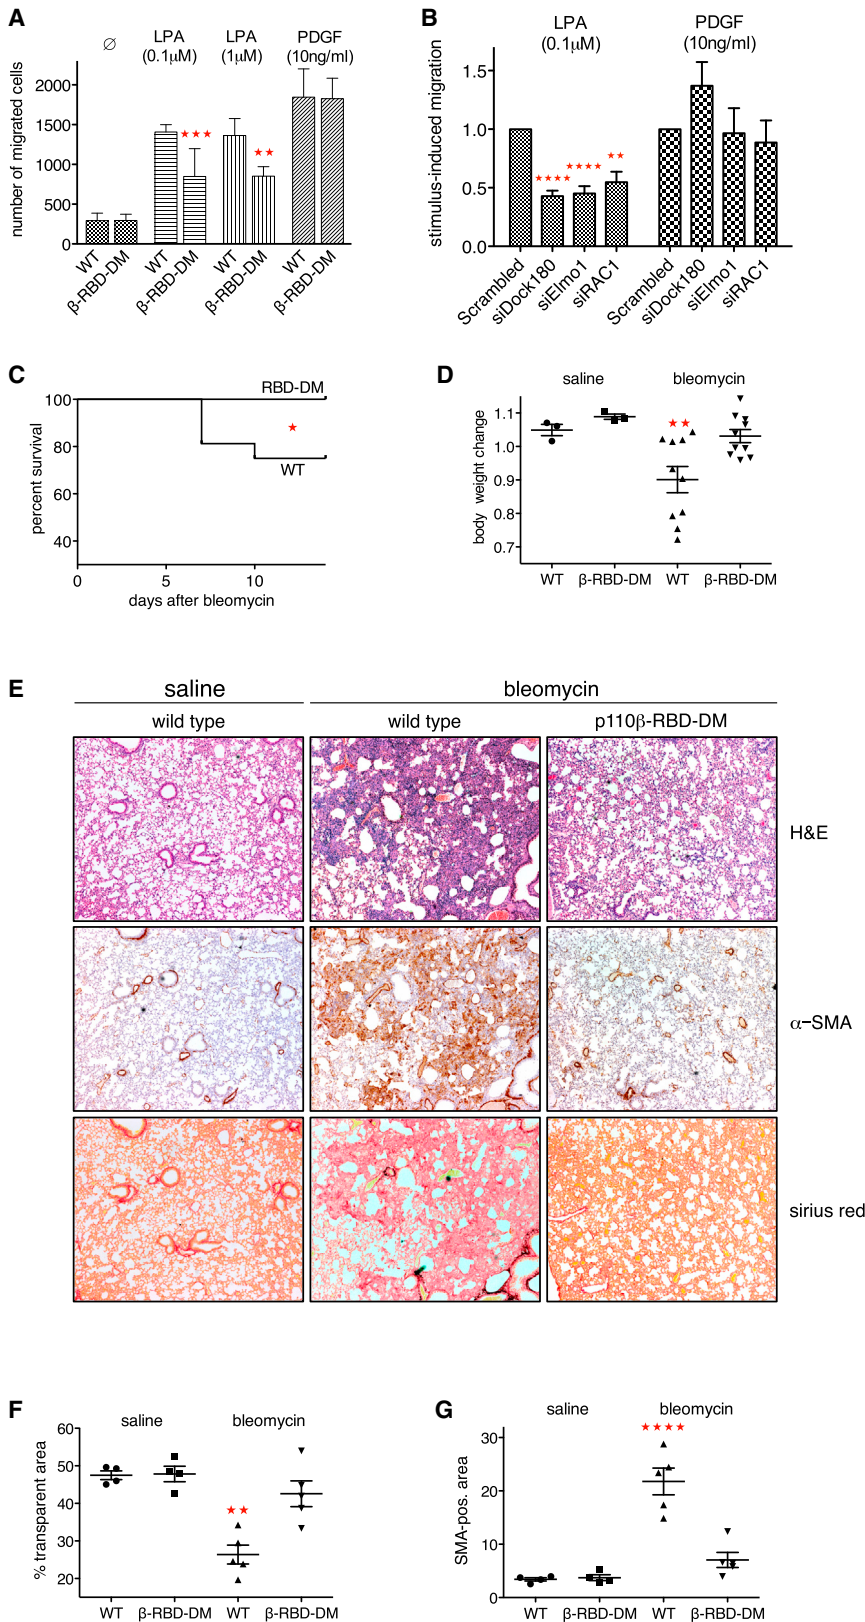

**Figure 7. p110 $\beta$ -RBD-DM Mice Are Protected from Bleomycin-Induced Lung Fibrosis**

(A) p110 $\beta$ -RBD-DM fibroblasts show reduced migration in gradients of LPA. Migration of wild-type and p110 $\beta$ -RBD-DM MEFs in gradients of LPA and PDGF was assessed in transwell filter assays (n = 3; mean with SD; one-way ANOVA).

(B) Dock180, Elmo1, and RAC1 are required for fibroblast migration in gradients of LPA. Immortalized wild-type MEFs were transfected with scrambled duplex or gene-specific siRNA pools targeting Dock180, Elmo1, or RAC1. Migration in gradients of LPA and PDGF was assessed in transwell filter assays and cell numbers were normalized to control conditions (n = 4; mean with SEM; one-way ANOVA).

(C) p110 $\beta$ -RBD-DM mice are protected against death from bleomycin-induced lung damage. Wild-type and homozygous p110 $\beta$ -RBD-DM mice were treated with a single intratracheal dose of bleomycin (1.25 U/kg) and observed for 14 days (n = 16 mice per genotype; Mantel-Cox test).

(D) p110 $\beta$ -RBD-DM mice are protected against weight loss following bleomycin instillation. Wild-type and p110 $\beta$ -RBD-DM mice received a single intratracheal dose of saline (n = 3 per genotype) or bleomycin (n = 10 per genotype) and weights were taken 14 days later (mean  $\pm$  SEM; one-way ANOVA).

(E) p110 $\beta$ -RBD-DM mice are protected from bleomycin-induced lung fibrosis. Representative lung areas from wild-type and homozygous p110 $\beta$ -RBD-DM mice 14 days after treatment with intratracheal bleomycin ( $\times$ 4 magnification). Top: H&E; middle: IHC for  $\alpha$ -SMA; bottom: Sirius red.

(F) p110 $\beta$ -RBD-DM mice are protected against loss of transparent lung areas following bleomycin instillation. Lungs were analyzed by H&E 14 days after bleomycin challenge. Multiple nonoverlapping areas of representative sections from each lung were photographed and transparent (white) areas were quantified using Nikon NIS elements software (mean  $\pm$  SEM; one-way ANOVA; see Figure S7C for raw data).

(G) p110 $\beta$ -RBD-DM mice accumulate fewer activated lung fibroblasts following bleomycin instillation. Lungs were analyzed by immunohistochemistry for smooth muscle antigen ( $\alpha$ -SMA) 14 days after bleomycin challenge. Multiple nonoverlapping areas of representative sections from each lung were photographed and SMA-positive (brown) areas were quantified using Nikon NIS elements software (mean  $\pm$  SEM; one-way ANOVA; see Figure S7D for raw data). See also Figure S7.



using microscopy-based assays in transfected cells revisited the interaction of small GTPases and PI3K, confirming that both active RAS and RHO family GTPases can activate PI3K in living cells. However, based on experimentation exclusively with a p110 $\alpha$  reporter construct, the authors interpreted PI3K regulation by RHO family members as indirect (Yang et al., 2012).

### RAC/CDC42 Binding to p110 $\beta$ Controls PI3K Activity In Vivo

Our findings in MEFs suggest that RAC1 and CDC42 cooperatively control steady-state PI3K activity in living cells by isoform-specific activation of p110 $\beta$  and that this requires the p110 $\beta$  RBD. A model in which p110 $\beta$  provides basal, low-level PI3K activity has been proposed in the context of insulin signaling (Knight et al., 2006), and data showing PTEN-loss-driven prostate cancers to be entirely dependent on p110 $\beta$ , as well as metabolic findings in p110 $\beta$  kinase-dead mice, have been interpreted in the same way (Ciraolo et al., 2008; Jia et al., 2008). Our data point to RAC1 and CDC42 as drivers of such a basal, p110 $\beta$ -controlled activity, an idea consistent with a previous report finding that ectopic expression of wild-type but not RBD mutant p110 $\beta$  is sufficient to transform chicken embryo fibroblasts (Kang et al., 2006). It will be interesting to explore the oncogenic potential of the RAC/CDC42-p110 $\beta$  interaction in the setting of PTEN loss and also in the context of the recently discovered activating mutations in RAC (Hodis et al., 2012; Krauthammer et al., 2012) in human melanomas, where p110 $\beta$  could be an important downstream target.

### GPCRs Activate p110 $\beta$ through its RBD

A firm body of in vivo evidence (Ciraolo et al., 2008; Guillemet-Guibert et al., 2008; Jia et al., 2008) has established p110 $\beta$  as a GPCR-regulated PI3K isoform. We find that mutation of the p110 $\beta$  RBD strongly attenuates p110 $\beta$  activation downstream of GPCRs, highlighting the importance of the RBD for p110 $\beta$  key signaling functions. The residual p110 $\beta$  activity in p110 $\beta$ -RBD-DM MEFs argues for a second, RBD-independent activation route, for which direct binding of G $\beta\gamma$  to p110 $\beta$  (Dbouk et al., 2012) is the most obvious candidate. A puzzling question is whether a cooperative effect of RBD interactor and G $\beta\gamma$  binding to p110 $\beta$  can suffice to fully activate p110 $\beta$ , or if additional phosphorylation input is required to overcome the strong inhibition of lipid kinase activity imposed by p85 (Zhang et al., 2011). Trans-activation of receptor tyrosine kinases has been suggested to activate p110 $\beta$  downstream of GPCRs (Yart et al., 2002). Although we found no effect of tyrosine kinase inhibitors and no p85 tyrosine phosphorylation in response to LPA in support of such a mechanism in MEFs, there is evidence for cooperative GPCR and phosphorylation signaling to p110 $\beta$  in leukocytes (Kulkarni et al., 2011), and such a scenario appears possible in thrombocytes, where p110 $\beta$  is activated by integrins, ITAM-bearing receptors, and GPCRs (Martin et al., 2010).

### Dock180/Elmo1 Couples GPCRs to RAC and p110 $\beta$

RAC1 is essential for p110 $\beta$  activation downstream of the GPCRs for LPA and S1P, and the RAC-GEF Dock180/Elmo1 is upstream of both RAC and p110 $\beta$  in this pathway. The Dock/Elmo-RAC signaling axis is a highly conserved pathway control-

ling RAC-dependent key functions such as actin remodeling, migration, and phagocytosis (Côté et al., 2005). Recent findings in *Dictyostelium* have directly linked G $\beta\gamma$  subunits from GPCRs to Dock/Elmo-RAC and the cytoskeleton (Yan et al., 2012). Reminiscent of *Dictyostelium* ElmoE, we find the N terminus of human Elmo1 to directly bind G $\beta\gamma$  subunits, suggesting conservation of this pathway in mammals. In line with this, PI3K activity is not required for RAC activation by LPA, placing p110 $\beta$  entirely downstream of RAC in fibroblasts, which contrasts with a proposed PIP $_3$ -driven feedback loop controlling RAC activity upstream and downstream of PI3K in leukocytes (Weiner et al., 2002). Although PI3K is not required to activate RAC, it is still essential for fibroblast migration in gradients of LPA, indicating that PIP $_3$ -regulated pathways distinct from RAC activation contribute to GPCR-driven chemotaxis. Importantly, whereas our findings identify Dock180/Elmo1 downstream of LPA/S1P in MEFs, our experiments cannot rule out involvement of other RAC-GEFs within this pathway. We also cannot directly prove that the role of Dock180/Elmo1 in controlling fibroblast migration is exclusively and directly through activation of RAC upstream of p110 $\beta$ . Finally, different GPCRs and other cell types may signal through RAC-GEFs other than Dock180/Elmo1, and further studies will be required to determine whether the Dock180/Elmo1-RAC1-p110 $\beta$  axis is a fixed signaling module or just one example of how RAC/CDC42 is activated upstream of p110 $\beta$ .

Overall, the picture that emerges from these studies is one in which p110 $\beta$  regulation by GPCRs operates through a two-track signaling pathway with direct and indirect input into p110 $\beta$ . The direct route involves G $\beta\gamma$  interaction with p110 $\beta$ , whereas the indirect route goes through stimulation of RAC via Dock180/Elmo1, possibly also recruited through G $\beta\gamma$  (see Figure 6F). Such two-track wiring is reminiscent of receptor tyrosine kinase regulation of p110 $\alpha$  via p85 interaction with tyrosine-phosphorylated receptor or adaptor protein and Grb2-Sos-RAS-p110 $\alpha$  interaction. It can be speculated that this signaling logic might provide an improved ability to amplify a weak signal input or might increase the possibility for fine-tuning the signal through crosstalk of other pathways onto components such as Dock180/Elmo1, RAC itself, or RAC-GAPs terminating RAC activity. Another interesting issue is whether such G $\beta\gamma$ -Elmo1 and G $\beta\gamma$ -p110 $\beta$  interactions are mutually exclusive or can occur in a heterotrimeric complex. At present, we cannot distinguish between a model in which one G $\beta\gamma$  protein heterodimer binds directly to both Elmo1 and p110 $\beta$  simultaneously and one in which Elmo and p110 $\beta$  are engaged by two different G $\beta\gamma$  protein heterodimers (as shown in Figure 6F).

See Supplemental Information online for the Extended Discussion, including information on other GTPase interactors of p110 $\beta$ , the phenotype of p110 $\beta$ -RBD mutant mice, and resistance of these mice to bleomycin-induced lung fibrosis.

## EXPERIMENTAL PROCEDURES

Detailed procedures are described in the Extended Experimental Procedures.

### Isothermal Titration Calorimetry

Purified recombinant soluble PI3K protein complexes were loaded into the cell of a MicroCal iTC200 microcalorimeter at concentrations of approximately 20  $\mu$ M. Nucleotide-loaded GTPases were loaded into the syringe at 200  $\mu$ M.



In a typical experiment, 16 injections of GTPase into the cell were recorded at 15°C, and relevant thermodynamic parameters were analyzed and calculated using the instrument's software (Origin).

### Bleomycin-Induced Lung Fibrosis

All animal experimentation was carried out in compliance with UK Home Office animal welfare regulations. Age- and sex-matched wild-type and homozygous p110 $\beta$ -RBD-DM mice from intercrosses of heterozygous p110 $\beta$ -RBD-DM animals were used to study bleomycin-induced lung fibrosis. Mice (8–12 weeks old) were anaesthetized with isoflurane, and bleomycin in sterile normal saline (1.25 U/kg) or saline alone (50  $\mu$ l) was given by intratracheal instillation. After 14 days, mice were culled and lungs were recovered for further analysis.

### SUPPLEMENTAL INFORMATION

Supplemental Information includes Extended Discussion, Extended Experimental Procedures, seven figures, and one table and can be found with this article online at <http://dx.doi.org/10.1016/j.cell.2013.04.031>.

### ACKNOWLEDGMENTS

We thank Jean Zhao for p110 $\alpha$ -loxP and p110 $\beta$ -loxP mice, Erik Sahai for plasmids, Raphael Chaleil and Paul Bates for their expertise on structure issues, Pablo Rodriguez-Viciano for discussion, and Miriam Molina-Arcas and David Hancock for help and advice. We thank LRI Core Technology Facilities, including Transgenic Services, Biological Resources, Peptide Synthesis, Equipment Park, and Cell Services.

Received: December 13, 2012

Revised: March 25, 2013

Accepted: April 8, 2013

Published: May 23, 2013

### REFERENCES

Bokoch, G.M., Vlahos, C.J., Wang, Y., Knaus, U.G., and Traynor-Kaplan, A.E. (1996). Rac GTPase interacts specifically with phosphatidylinositol 3-kinase. *Biochem. J.* **315**, 775–779.

Christoforidis, S., Miaczynska, M., Ashman, K., Wilm, M., Zhao, L., Yip, S.C., Waterfield, M.D., Backer, J.M., and Zerial, M. (1999). Phosphatidylinositol-3-OH kinases are Rab5 effectors. *Nat. Cell Biol.* **1**, 249–252.

Ciraolo, E., Iezzi, M., Marone, R., Marengo, S., Curcio, C., Costa, C., Azzolino, O., Gonella, C., Rubinetto, C., Wu, H., et al. (2008). Phosphoinositide 3-kinase p110beta activity: key role in metabolism and mammary gland cancer but not development. *Sci. Signal.* **1**, ra3.

Côté, J.F., Motoyama, A.B., Bush, J.A., and Vuori, K. (2005). A novel and evolutionarily conserved PtdIns(3,4,5)P<sub>3</sub>-binding domain is necessary for DOCK180 signalling. *Nat. Cell Biol.* **7**, 797–807.

Dbouk, H.A., Vadas, O., Shymanets, A., Burke, J.E., Salamon, R.S., Khalil, B.D., Barrett, M.O., Waldo, G.L., Surve, C., Hsueh, C., et al. (2012). G protein-coupled receptor-mediated activation of p110 $\beta$  by G $\beta\gamma$  is required for cellular transformation and invasiveness. *Sci. Signal.* **5**, ra89.

Funamoto, S., Meili, R., Lee, S., Parry, L., and Firtel, R.A. (2002). Spatial and temporal regulation of 3-phosphoinositides by PI 3-kinase and PTEN mediates chemotaxis. *Cell* **109**, 611–623.

Geering, B., Cutillas, P.R., Nock, G., Gharbi, S.I., and Vanhaesebroeck, B. (2007). Class IA phosphoinositide 3-kinases are obligate p85-p110 heterodimers. *Proc. Natl. Acad. Sci. USA* **104**, 7809–7814.

Guillemet-Guibert, J., Bjorklof, K., Salpekar, A., Gonella, C., Ramadani, F., Bilancio, A., Meek, S., Smith, A.J., Okkenhaug, K., and Vanhaesebroeck, B. (2008). The p110beta isoform of phosphoinositide 3-kinase signals downstream of G protein-coupled receptors and is functionally redundant with p110gamma. *Proc. Natl. Acad. Sci. USA* **105**, 8292–8297.

Gupta, S., Ramjaun, A.R., Haiko, P., Wang, Y., Warne, P.H., Nicke, B., Nye, E., Stamp, G., Alitalo, K., and Downward, J. (2007). Binding of ras to phosphoin-

sitide 3-kinase p110alpha is required for ras-driven tumorigenesis in mice. *Cell* **129**, 957–968.

Hodis, E., Watson, I.R., Kryukov, G.V., Arold, S.T., Imielinski, M., Theurillat, J.P., Nickerson, E., Auclair, D., Li, L., Place, C., et al. (2012). A landscape of driver mutations in melanoma. *Cell* **150**, 251–263.

Jackson, S.P., Schoenwaelder, S.M., Goncalves, I., Nesbitt, W.S., Yap, C.L., Wright, C.E., Kenche, V., Anderson, K.E., Doppeide, S.M., Yuan, Y., et al. (2005). PI 3-kinase p110beta: a new target for antithrombotic therapy. *Nat. Med.* **11**, 507–514.

Jia, S., Liu, Z., Zhang, S., Liu, P., Zhang, L., Lee, S.H., Zhang, J., Signoretto, S., Loda, M., Roberts, T.M., and Zhao, J.J. (2008). Essential roles of PI(3)K-p110beta in cell growth, metabolism and tumorigenesis. *Nature* **454**, 776–779.

Kang, S., Denley, A., Vanhaesebroeck, B., and Vogt, P.K. (2006). Oncogenic transformation induced by the p110beta, -gamma, and -delta isoforms of class I phosphoinositide 3-kinase. *Proc. Natl. Acad. Sci. USA* **103**, 1289–1294.

Keely, P.J., Westwick, J.K., Whitehead, I.P., Der, C.J., and Parise, L.V. (1997). Cdc42 and Rac1 induce integrin-mediated cell motility and invasiveness through PI(3)K. *Nature* **390**, 632–636.

Knight, Z.A., Gonzalez, B., Feldman, M.E., Zunder, E.R., Goldenberg, D.D., Williams, O., Loewith, R., Stokoe, D., Balla, A., Toth, B., et al. (2006). A pharmacological map of the PI3-K family defines a role for p110alpha in insulin signaling. *Cell* **125**, 733–747.

Krauthammer, M., Kong, Y., Ha, B.H., Evans, P., Bacchiocchi, A., McCusker, J.P., Cheng, E., Davis, M.J., Goh, G., Choi, M., et al. (2012). Exome sequencing identifies recurrent somatic RAC1 mutations in melanoma. *Nat. Genet.* **44**, 1006–1014.

Kulkarni, S., Sitaru, C., Jakus, Z., Anderson, K.E., Damoulakis, G., Davidson, K., Hirose, M., Juss, J., Oxley, D., Chessa, T.A., et al. (2011). PI3K $\beta$  plays a critical role in neutrophil activation by immune complexes. *Sci. Signal.* **4**, ra23.

Kurosu, H., Maehama, T., Okada, T., Yamamoto, T., Hoshino, S., Fukui, Y., Ui, M., Hazeki, O., and Katada, T. (1997). Heterodimeric phosphoinositide 3-kinase consisting of p85 and p110beta is synergistically activated by the beta-gamma subunits of G proteins and phosphotyrosyl peptide. *J. Biol. Chem.* **272**, 24252–24256.

Maier, U., Babich, A., and Nürnberg, B. (1999). Roles of non-catalytic subunits in gbetagamma-induced activation of class I phosphoinositide 3-kinase isoforms beta and gamma. *J. Biol. Chem.* **274**, 29311–29317.

Martin, V., Guillemet-Guibert, J., Chicanne, G., Cabou, C., Jandrot-Perrus, M., Plantavid, M., Vanhaesebroeck, B., Payrastra, B., and Gratacap, M.P. (2010). Deletion of the p110beta isoform of phosphoinositide 3-kinase in platelets reveals its central role in Akt activation and thrombus formation in vitro and in vivo. *Blood* **115**, 2008–2013.

Orme, M.H., Alrubaie, S., Bradley, G.L., Walker, C.D., and Leever, S.J. (2006). Input from Ras is required for maximal PI(3)K signalling in Drosophila. *Nat. Cell Biol.* **8**, 1298–1302.

Pacold, M.E., Suire, S., Perisic, O., Lara-Gonzalez, S., Davis, C.T., Walker, E.H., Hawkins, P.T., Stephens, L., Eccleston, J.F., and Williams, R.L. (2000). Crystal structure and functional analysis of Ras binding to its effector phosphoinositide 3-kinase gamma. *Cell* **103**, 931–943.

Patel, M., Chiang, T.C., Tran, V., Lee, F.J., and Côté, J.F. (2011). The Arf family GTPase Arf4A complexes with ELMO proteins to promote actin cytoskeleton remodeling and reveals a versatile Ras-binding domain in the ELMO proteins family. *J. Biol. Chem.* **286**, 38969–38979.

Rodriguez-Viciano, P., Warne, P.H., Dhand, R., Vanhaesebroeck, B., Gout, I., Fry, M.J., Waterfield, M.D., and Downward, J. (1994). Phosphatidylinositol-3-OH kinase as a direct target of Ras. *Nature* **370**, 527–532.

Rodriguez-Viciano, P., Warne, P.H., Vanhaesebroeck, B., Waterfield, M.D., and Downward, J. (1996). Activation of phosphoinositide 3-kinase by interaction with Ras and by point mutation. *EMBO J.* **15**, 2442–2451.

Rodriguez-Viciano, P., Sabatier, C., and McCormick, F. (2004). Signaling specificity by Ras family GTPases is determined by the full spectrum of effectors they regulate. *Mol. Cell. Biol.* **24**, 4943–4954.

- Schulte, A., Stolp, B., Schönichen, A., Pylypenko, O., Rak, A., Fackler, O.T., and Geyer, M. (2008). The human formin FHOD1 contains a bipartite structure of FH3 and GTPase-binding domains required for activation. *Structure* 16, 1313–1323.
- Srinivasan, S., Wang, F., Glavas, S., Ott, A., Hofmann, F., Aktories, K., Kalman, D., and Bourne, H.R. (2003). Rac and Cdc42 play distinct roles in regulating PI(3,4,5)P3 and polarity during neutrophil chemotaxis. *J. Cell Biol.* 160, 375–385.
- Suire, S., Condliffe, A.M., Ferguson, G.J., Ellson, C.D., Guillou, H., Davidson, K., Welch, H., Coadwell, J., Turner, M., Chilvers, E.R., et al. (2006). Gbetagamma and the Ras binding domain of p110gamma are both important regulators of PI(3)Kgamma signalling in neutrophils. *Nat. Cell Biol.* 8, 1303–1309.
- Tager, A.M., LaCamera, P., Shea, B.S., Campanella, G.S., Selman, M., Zhao, Z., Polosukhin, V., Wain, J., Karimi-Shah, B.A., Kim, N.D., et al. (2008). The lysophosphatidic acid receptor LPA1 links pulmonary fibrosis to lung injury by mediating fibroblast recruitment and vascular leak. *Nat. Med.* 14, 45–54.
- Tolias, K.F., Cantley, L.C., and Carpenter, C.L. (1995). Rho family GTPases bind to phosphoinositide kinases. *J. Biol. Chem.* 270, 17656–17659.
- Vanhaesebroeck, B., Welham, M.J., Kotani, K., Stein, R., Warne, P.H., Zvelebil, M.J., Higashi, K., Volinia, S., Downward, J., and Waterfield, M.D. (1997). P110delta, a novel phosphoinositide 3-kinase in leukocytes. *Proc. Natl. Acad. Sci. USA* 94, 4330–4335.
- Vanhaesebroeck, B., Guillermet-Guibert, J., Graupera, M., and Bilanges, B. (2010). The emerging mechanisms of isoform-specific PI3K signalling. *Nat. Rev. Mol. Cell Biol.* 11, 329–341.
- Weiner, O.D., Neilsen, P.O., Prestwich, G.D., Kirschner, M.W., Cantley, L.C., and Bourne, H.R. (2002). A PtdInsP(3)- and Rho GTPase-mediated positive feedback loop regulates neutrophil polarity. *Nat. Cell Biol.* 4, 509–513.
- Welch, H.C., Coadwell, W.J., Stephens, L.R., and Hawkins, P.T. (2003). Phosphoinositide 3-kinase-dependent activation of Rac. *FEBS Lett.* 546, 93–97.
- Yan, J., Mihaylov, V., Xu, X., Brzostowski, J.A., Li, H., Liu, L., Veenstra, T.D., Parent, C.A., and Jin, T. (2012). A Gβγ effector, ElmoE, transduces GPCR signaling to the actin network during chemotaxis. *Dev. Cell* 22, 92–103.
- Yang, H.W., Shin, M.G., Lee, S., Kim, J.R., Park, W.S., Cho, K.H., Meyer, T., and Do Heo, W. (2012). Cooperative activation of PI3K by Ras and Rho family small GTPases. *Mol. Cell* 47, 281–290.
- Yart, A., Chap, H., and Raynal, P. (2002). Phosphoinositide 3-kinases in lysophosphatidic acid signaling: regulation and cross-talk with the Ras/mitogen-activated protein kinase pathway. *Biochim. Biophys. Acta* 1582, 107–111.
- Zhang, X., Vadas, O., Perisic, O., Anderson, K.E., Clark, J., Hawkins, P.T., Stephens, L.R., and Williams, R.L. (2011). Structure of lipid kinase p110β/p85β elucidates an unusual SH2-domain-mediated inhibitory mechanism. *Mol. Cell* 41, 567–578.
- Zheng, Y., Bagrodia, S., and Cerione, R.A. (1994). Activation of phosphoinositide 3-kinase activity by Cdc42Hs binding to p85. *J. Biol. Chem.* 269, 18727–18730.

## EXTENDED DISCUSSION

### Other GTPase Interactors of p110 $\beta$

The only small GTPase previously found to interact with p110 $\beta$  is RAB5. p110 $\beta$ /p85 copurified with RAB5 in a study searching for RAB5 interactors (Christoforidis et al., 1999) and RAB5 was identified in a yeast two hybrid screen searching for p110 $\beta$  interactors (Kurosu and Katada, 2001). p110 $\beta$  appears to associate with RAB5 in the early endocytic pathway, where it has been proposed to indirectly contribute to PtdIns(3)P formation (Shin et al., 2005), and RAB5 and p110 $\beta$  have further been suggested to be part of the autophagy-promoting Vps34–Vps15–Beclin1–Atg14L complex (Dou et al., 2010). The RAB5-binding site on p110 $\beta$  remains to be determined, yet several findings argue against RAB5 binding to p110 $\beta$  through the RBD: (1) binding of RAB5 is entirely unaffected by p110 $\beta$  RBD mutations (Figure 3C); (2) RAB5 does not appear to stimulate p110 $\beta$  (Figure 1C, (Christoforidis et al., 1999; Rodriguez-Viciano et al., 2004); (3) the affinity between RAB5 and p110 $\beta$  in solution appears to be significantly higher (data not shown) than for typical PI3K RBD interactors, suggesting a more stable interaction, allowing to effectively localize p110 $\beta$  to RAB5-positive subcellular compartments.

Out of the murine 34 members of the RAS subfamily of small GTPases, only DIRAS-1 and DIRAS-2 showed binding to p110 $\beta$  (Figures S1C and S2B). Human DIRAS-3, also termed ARHI or NOEY2, a tumor suppressor in ovarian cancer and putative autophagy regulator (Lu et al., 2008), showed no interaction (data not shown). DIRAS-1 and -2 are relatively understudied RAS subfamily GTPases with low endogenous GTPase activity, whose expression appears to be limited to brain and heart (Ellis et al., 2002; Kontani et al., 2002). And whereas the relatedness to RAS and the inability to bind to RBD mutant p110 $\beta$  (Figure S2B) argues for binding to the RBD in vitro, the absence of any detectable stimulatory effect on p110 $\beta$ , the limited tissue distribution and growth-inhibitory effects make the role of DIRAS proteins as RBD interactors of p110 $\beta$  in vivo unclear, and further studies will be dedicated to this subject.

### p110 $\beta$ -RBD-DM Mice

Direct analysis of signaling complexes regulating type I PI3K isoforms in living cells is notoriously difficult due to the transient, low-affinity nature of these interactions and their instability in solution. We therefore generated p110 $\beta$ -RBD-DM mice as a tool to study the impact of interactor binding to p110 $\beta$  for PI3K signaling in vivo. p110 $\beta$ -RBD-DM pups and mice are slightly smaller than wild-type littermates, and are born in slightly sub-Mendelian ratios, both features reported—to an overall more severe extent—from p110 $\beta$  knockout and p110 $\beta$  kinase-dead knock in mice ( $\beta$ -KD) (Ciraolo et al., 2010; Guillemet-Guibert et al., 2008; Kulkarni et al., 2011). A straightforward comparison between RBD mutant mice and these models is, however, complicated not only by different genetic backgrounds, but also by the different genetics of these models. Complete loss of p110 $\beta$  catalytic subunit will inadvertently lead to some disturbance of subunit composition and/or recruitment to signaling complexes, an artifact noticeable in recently published work (Utermark et al., 2012). Also one of the  $\beta$ -KD models (Ciraolo et al., 2008) has been found to have reduced p110 $\beta$  expression, both in embryos and adult tissues, placing these animals between knockout and other  $\beta$ -KD mice. A milder phenotype of p110 $\beta$ -RBD-DM mice is after all not unexpected, given that the RBD mutations do not disrupt basal p110 $\beta$  activity or RBD-independent activation routes, and some p110 $\beta$  activity might be enough for normal development and life under controlled conditions. We also saw moderately reduced proliferation of p110 $\beta$ -RBD-DM primary MEFs, indicating that p110 $\beta$  regulation through its RBD interactors is essential for normal cell proliferation, which appears to contradict findings from  $\beta$ -KD MEFs and reconstituted p110 $\beta$ -KO MEFs suggesting that p110 $\beta$  lipid kinase activity is not required for proliferation. (Ciraolo et al., 2008; Jia et al., 2008). Although no role of p110 $\beta$  lipid kinase activity for cell proliferation appears surprising in light of the reported growth defect in these mice, the discrepancies between these studies could well be down to technical reasons, such as the use of short term assays against the 3T3 protocol employed in our study and – at least for reconstituted KO cells – the use of immortalized and repeatedly manipulated cells against the use of early passage primary p110 $\beta$ -RBD-DM MEFs.

### p110 $\beta$ -RBD-DM Mice Are Resistant to Bleomycin-Induced Lung Fibrosis

Fibroblasts are motile cells with proposed key roles in the development and progression of a wide range of diseases, including cancer and fibrosis (Wynn and Ramalingam, 2012). LPA has been identified as a critical fibroblast chemoattractant in experimental lung fibrosis, and LPA1 receptor knockout mice are protected in this model (Tager et al., 2008). Our findings establish p110 $\beta$  as critical downstream target of LPA in vivo. By inference, the protection of p110 $\beta$ -RBD-DM mice against bleomycin-induced lung fibrosis, together with the reduced migration of p110 $\beta$ -RBD-DM fibroblasts in LPA-gradients, suggests that p110 $\beta$  activation downstream of LPA might be critical for fibroblast chemotaxis to sites of tissue damage in vivo. However, the RAC-p110 $\beta$  axis might also be required for other fibroblast-specific functions involved in fibrogenesis such as secretion and remodelling of extracellular matrix components. Further studies will be required to decipher the precise role of p110 $\beta$  in the development of fibrosis in the lung and potentially other organ systems, and to learn whether a similar mechanism exists to recruit fibroblasts to sites of primary tumors and metastases, processes that could then be targeted by isoform-specific p110 $\beta$  inhibitors or strategies specifically disrupting the Dock180/Elmo1-RAC-p110 $\beta$  signaling axis.

## EXTENDED EXPERIMENTAL PROCEDURES

### Reagents and Antibodies

Pertussis toxin, EHT1864, sphingosine 1-phosphate and NSC23766 were from Tocris Bioscience; lysophosphatidic acid, GDP, GTP $\gamma$ S, insulin, bleomycin and protease inhibitors were from Sigma Aldrich; EGF and PDGF were from PeproTech. Antibodies to p110 $\alpha$ , p110 $\beta$ , p85, phospho-AKT (T308), phospho-AKT (S473), total AKT, phospho-ERK, total ERK and P-Tyr were from Cell Signaling Technology. Antibodies to Dock180 were from Santa Cruz Biotechnologies, antibodies to FLAG,  $\alpha$ -tubulin and vinculin from Sigma Aldrich. Monoclonal antibody to Myc and GST tags were made in house.

### Plasmids and Cloning

cDNAs for p110 $\alpha$ , p110 $\beta$ , p110 $\gamma$  and p110 $\delta$  were PCR amplified from a murine cDNA library introducing an N-terminal FLAG or Myr-FLAG tag (containing a myristoylation signal). Murine p85,  $\Delta$ p85, G $\beta$ <sub>1</sub> and G $\gamma$ <sub>2</sub> were amplified untagged, and all were cloned into pSG5 and fully sequenced. RBD mutations were introduced by site-directed mutagenesis and final constructs were fully sequenced. RAS and RHO subfamily GTPases as well as RAB5 were PCR-amplified from murine cDNA, cloned into pGEX-2T and sequenced. RAB5, DIRAS1 and DIRAS2 were subcloned into pcDNA3 introducing an N-terminal Myc tag and mutations were generated by site-directed mutagenesis. pEF-V12-RAC, pEF-V12-CDC42 and pEF-V14-RHOA were gifts from Erik Sahai, pcDNA-Myc-V12-HRAS, -KRAS and -NRAS were from UMR cDNA Resource Center. Human Elmo1 and fragments were PCR amplified from cDNA, cloned into pGEX-2T and sequenced.

### Protein Purification

To produce purified recombinant GTPases on beads, cDNAs in pGEX-2T were transformed into BL21 *E. coli* (Stratagene). Protein expression was induced by addition of isopropyl  $\beta$ -D-thiogalactoside (IPTG, 0.1 mM) overnight at 16°C. Bacterial lysates were made and GST-fusion proteins were recovered on glutathione agarose beads. To produce soluble untagged GTPases, cDNAs encoding RAC1, CDC42, HRAS and DIRAS1 were subcloned into pGEX-6P and GTPases were cleaved off GST tag and beads by overnight incubation with HRV 3C protease (in-house made) at 4°C. When required, soluble GTPases were loaded with nucleotide in solution by addition of GDP or GTP $\gamma$ S (20 $\times$  molar excess) and EDTA (5 mM final concentration), followed by incubation at 30°C for 30 min and addition of MgCl<sub>2</sub> to a final concentration of 10 mM on ice. Loaded GTPases were gel-filtrated, concentrated (all at 4°C) and snap-frozen.

To express full-length GST-p110/p85 protein complexes, cDNAs were subcloned into pBacPAK-His3-GST, preserving the GST tag for p110 and removing it for p85/ $\Delta$ p85. High 5 (Life Technologies) insect cells were co-infected with baculoviruses encoding the respective PI3K subunits, lysed after 72 hr, and complexes were recovered on glutathione agarose, evaluated by gel electrophoresis and either used for pull down experiments on beads, or cleaved off overnight with HRV 3C protease, gel-filtrated and snap frozen.

For production of recombinant G $\beta\gamma$ , cDNAs for murine G $\beta$ <sub>2</sub> and G $\gamma$ <sub>1</sub> were subcloned into pBacPAK-His3-TEV, removing the HIS tag for G $\beta$  and preserving it for G $\gamma$ . G $\beta\gamma$  complexes were purified from High 5 cell lysates on NTA agarose, gel-filtrated and snap frozen.

### Protein-Binding Assays

For GST pulldown assays, approximately 10  $\mu$ g of GST fusion protein were immobilized on 20  $\mu$ l glutathione sepharose beads. Immobilized GTPases were loaded with nucleotide by adding 50  $\mu$ l of GTPase loading buffer (20 mM Tris-HCl pH 7.4, 5 mM EDTA, 25 mM NaCl) containing GDP or GTP $\gamma$ S at 2 mM. After 20 min at 37°C, MgCl<sub>2</sub> was added to a final concentration of 10 mM on ice. Proteins on beads were incubated with either 1 ml of cell lysate made from a confluent 60 mm dish of transfected COS7 cells, or with recombinant purified protein diluted in GST-binding buffer (20 mM Tris-HCl [pH 7.4], 150 mM NaCl, 5 mM MgCl<sub>2</sub>, 1% Triton X-100, 5 mg/ml BSA). After 1 hr, beads were washed and proteins solubilized by boiling in LDS sample buffer (Life Science Technologies).

### [<sup>3</sup>H]-GTP Uptake of Small GTPases

To compare GTP uptake across different preparations of purified recombinant GTPases, each sample was loaded on beads with 2 mM GTP containing 1  $\mu$ Ci [<sup>3</sup>H]-GTP, following the procedure detailed above. Unbound GTP was removed by rigorous washes, GTPases on beads were resuspended in scintillation fluid, and counts per minutes were recorded in a scintillation counter over a GST only background. Data are presented as counts per minute normalized to protein amounts, estimated by western blot for GST and quantification on the Li-Cor Odyssey system.

### Lipid Kinase Assays

Purified recombinant, untagged and soluble p110/p85 protein complexes were incubated in kinase assay buffer (50 mM HEPES, [pH 7.4], 50 mM NaCl, 5 mM MgCl<sub>2</sub>, 0.03% CHAPS, 2 mM DTT, 25  $\mu$ M ATP) with 4  $\mu$ M PI(4,5)P<sub>2</sub>-diC8 as substrate for 1 hr at 25°C. Reactions were terminated by adding 6 mM EDTA, and PI(3,4,5)P<sub>3</sub> was quantified using a commercial competitive ELISA



(Echelon Biosciences). For some reactions, recombinant  $G\beta_2\gamma_1$  dimers were added at a 1  $\mu$ M or a PDGF receptor-derived recombinant phospho-tyrosine peptide (pY740: DGG(pY)MDMSKDE) was present at 10  $\mu$ M.

### Lipid Extraction and $PIP_3$ Quantification

For quantification of cellular  $PI(3,4,5)P_3$ -levels, acidic lipids were extracted from overnight serum-starved COS7 cells following a standard lipid extraction protocol. In brief, cells were lysed in ice-cold trichloroacetic acid (TCA, 0.5 M). Pellets were washed in 5%TCA/1 mM EDTA and neutral lipids were extracted with MeOH:CHCl<sub>3</sub> (2:1) and discarded. Acidic lipids were extracted with MeOH:CHCl<sub>3</sub>:HCl (80:40:1), recovered by phase-split, dried and resuspended.  $PI(3,4,5)P_3$ -levels were quantified by competitive ELISA (Echelon Biosciences).

### Isothermal Titration Calorimetry

Purified recombinant soluble PI3K protein complexes and soluble nucleotide-loaded GTPases were gel-filtrated into ITC buffer (phosphate-buffered saline [pH 7.4], 5 mM MgCl<sub>2</sub>, 1 mM Tris(2-carboxyethyl)phosphine hydrochloride) at 4°C. PI3K was loaded into the cell of a MicroCal iTC200 microcalorimeter at concentrations of approximately 20  $\mu$ M. GTPases were loaded into the syringe at 200  $\mu$ M. In a typical experiment, 16 injections of GTPase into the cell were recorded at 15°C, and relevant thermodynamic parameters were analyzed and calculated using the instrument's software (Origin). GTPase injections into buffer only were done to determine heats of dilution.

### Generation of p110 $\beta$ -RBD-DM Mice

A gene targeting vector was designed to replace exon 6 of the murine *Pik3cb* gene, encoding the p110 $\beta$  catalytic subunit, with an engineered version bearing two single point mutations leading to the exchange of two RBD key residues (S205D, K224A). An FRT-flanked neomycin selection cassette (GeneBridges) was PCR-amplified and inserted into murine genomic DNA immediately downstream of *Pik3cb* exon 6 in a murine BAC clone, using Red/ET recombination technology (GeneBridges). Selection cassette and flanking arms of genomic DNA (arms of homology, 4kb upstream and 2kb downstream of exon 6, respectively) were subcloned into a targeting vector backbone taken from PGKneoLox2DTA.2 (Phil Soriano), again by using Red/ET-based recombination in *E. coli*. Plasmid DNA was isolated and mutations were introduced by site-directed mutagenesis (Quikchange XL, Stratagene). The targeting construct was fully sequenced, linearized, and electroporated into C57BL/6 ES cells. Neomycin-resistant ES cell clones were screened for homologous recombination by genomic PCR bridging the short arm of the construct and confirmed by PCRs bridging the long arm of homology and the entire targeting region (biallelic PCR). Takara LA-Taq DNA polymerase was used for amplification of long genomic fragments. Several correctly targeted ES clones were injected into blastocysts or 8-cell embryos and implanted into pseudopregnant foster mothers following standard techniques. Offspring of chimera was genotyped for germline transmission. Two independent founder lines were maintained, and mutations were confirmed by genomic sequencing. The neomycin selection cassette was removed by crosses of heterozygous p110 $\beta$ -RBD-DM mice with FLPe deleter mice, leaving a single FRT site in intron 6/7, which was used for PCR genotyping. Genotyping was later outsourced to an automated genotyping provider (Transnetix).

### Mouse Embryonic Fibroblasts

To generate wild-type and homozygous p110 $\beta$ -RBD-DM MEFs, E13.5 mouse embryos from intercrosses of heterozygous p110 $\beta$ -RBD-DM mice were collected, minced and trypsinized. Heads were separated for genotyping. MEFs from each four wild-type and homozygous embryos were made and used throughout this study. For immortalization, MEFs were transduced with SV40 large T antigen. To generate p110 $\alpha$  and p110 $\beta$  knockout MEFs, mice harboring conditional floxed alleles for p110 $\alpha$  (Zhao et al., 2006) or p110 $\beta$  (Jia et al., 2008) were crossed with Rosa26CreER(T2) mice to generate p110 $\alpha$ <sup>lox/lox</sup>;CreER<sup>+/-</sup> and p110 $\beta$ <sup>lox/lox</sup>;CreER<sup>+/-</sup> embryos. Conditional MEFs made from these embryos were immortalized, expanded and treated with 4-hydroxytamoxifen (1  $\mu$ M) for 3 consecutive days, prior to use in experiments. Deletion of p110 $\alpha$  or p110 $\beta$  was assessed by western blot.

### Cell Culture, Plasmid, and siRNA Transfections

COS7 cells and mouse embryonic fibroblasts (MEFs) were maintained in DMEM, supplemented with 10% fetal calf serum (FCS). For serum starvation, MEFs were washed twice with sterile phosphate buffered saline (PBS) and incubated in serum-free DMEM, supplemented with 0.5% fatty acid-free bovine serum albumin (BSA, Sigma Aldrich). Plasmids were transfected into COS7 cells with Lipofectamine 2000 (Life Science Technologies), following the manufacturer's protocol. MEFs were plasmid transfected by electroporation using the Amaxa Nucleofector system.

siRNA was transfected into immortalized MEFs using Dharmafect 4 (Dharmacon), following manufacturer's protocols. siGENOME siRNA pools were used to target RAC-GEFs, ON-TARGETplus pools for RAC1 and CDC42, and Non-Targeting Pool 2 for control transfections (all from Dharmacon). siRNA sequences are listed in Table S1.

### Immunoprecipitation and Western Blotting

Western blotting was performed following standard methods. In brief, cells were washed twice in ice-cold PBS, before they were lysed directly in preheated LDS sample buffer (Life Science Technologies). Samples were heated to 98°C for 3 min, run on NuPage Bis-Tris gels (Life Science Technologies) and transferred to PVDF membranes (Millipore). Immunodetection of proteins was

performed either by conventional HRP-based chemiluminescence or by fluorescence-based detection using the Li-Cor Odyssey system and therefore recommended protocols and reagents.

For immunoprecipitation of p85, MEFs were lysed in IP buffer (20 mM Tris-HCl [pH 7.4], 150 mmol NaCl, 5 mmol MgCl<sub>2</sub>, 1% Triton X-100, protease inhibitor cocktail [Sigma Aldrich], 10 mM β-glycerol phosphate, 10 mM NaF, 10 mM sodium pyrophosphate), and lysates were cleared by centrifugation. Anti-p85 antibody was precoupled to protein A sepharose beads (Sigma Aldrich) and was incubated with lysates for 2 hr. Beads were washed, boiled in LDS sample buffer and analyzed by western blot. Lysates were run in parallel.

### Quantitative Real-Time PCR

To compare Elmo1/Elmo2 mRNA abundance after siRNA transfections, total RNA was extracted from transfected immortalized wild-type MEFs (QIAGEN RNA mini kit), and 1 μg of total mRNA was reverse-transcribed into cDNA. Quantitative real-time PCR (qPCR) was performed following standard protocols, Elmo1/2 mRNA levels were normalized to beta-actin and changes estimated using the ΔΔCt method. Primers used were QIAGEN Quantitect Primer assays for Elmo1, Elmo2 and beta-actin.

### Growth Factor and Lysophospholipid Signaling Assays

For growth factor and lysophospholipid stimulation experiments, early passage primary MEFs were seeded at  $3 \times 10^5$  cells in 6 cm cell culture dishes, starved in serum-free medium, supplemented with 0.5% BSA, overnight and stimulated as desired. Cells were rapidly washed in ice-cold PBS and directly lysed in preheated LDS sample buffer, prior to analysis by western blot.

### Proliferation Assays

To study proliferation of MEFs in culture, early passage primary MEFs (P2) from each two wild-type and homozygous p110β-RBD-DM embryos, derived from HET x HET crosses, were seeded at a defined number, grown in full serum for 3 days, trypsinized, counted in triplicate and reseeded at original numbers (modified 3T3 protocol). Each such cycle represents one passage for analysis. Population doubling rate was calculated as  $PDR = \log(n(\text{day } 3)/n(\text{seeded})) \times \log(2)$ . For cell cycle analysis, primary MEFs growing in 1% or 10% FCS were digested off, fixed in 70% ethanol, stained with propidium iodide, and analyzed by flow cytometry.

### Migration Assays

For migration assays, serum-starved immortalized MEFs were seeded onto 8 μm pore size cell culture inserts, coated with 10 μg/ml fibronectin. Inserts were placed into wells containing 500 μl serum-free DMEM, supplemented with 0.5% fatty-acid-free BSA and chemoattractant as required. Cells were allowed to migrate for 6 hr, before they were fixed in 4% paraformaldehyde for 10 min. Non-migrated cells were scraped off using cotton wool tips, and membranes were recovered and mounted onto microscopic slides in VECTASHIELD HardSet mounting medium with DAPI (Vector laboratories). Several nonoverlapping low-magnification fields were photographed on a NIKON fluorescence microscope, and cells were semiautomatically counted using the object count function of NIKON NIS elements. For studies with siRNA-transfected MEFs, cells were transfected 48 hr prior to migration experiment. To assess migration of plasmid transfected MEFs, cells were cotransfected with pmaxGFP and migrated GFP-positive cells were counted.

### RAC Activation Assay

For RAC activation assays, the GST-tagged active RAC and CDC42-binding domain of PAK1 (GST-PAK-PBD) was expressed in *E. coli* and purified on glutathione agarose beads (10 μg protein on 20 μl bead volume per reaction). Immortalized wild-type and p110β-RBD-DM MEFs were seeded on 150 mm tissue culture dishes, grown to 50% confluency, serum-starved overnight, inhibitor-treated as desired and stimulated one at a time. For siRNA experiments, cells were harvested 48 hr after transfection and following an overnight starvation. For harvest, cells were rapidly washed twice in ice-cold PBS and lysed in 1 ml GST lysis buffer (20 mM Tris-HCl [pH 7.4], 150 mmol NaCl, 5 mmol MgCl<sub>2</sub>, 1% Triton X-100, 1 mM DTT, protease inhibitors, 10 mM β-glycerol phosphate, 10 mM NaF). Cells were scraped off and lysates were cleared at full speed for 2 min in a cooled microcentrifuge. Supernatants were snap frozen in liquid nitrogen. Once all dishes were harvested, lysates were carefully thawed and incubated with GST-PAK-PBD for 1 hr. Beads were washed several times and bound RAC was identified and quantified by western blot (Li-Cor Odyssey). Lysates were analyzed in parallel and RAC-GTP/total RAC ratios were determined.

### Histology and Morphometric Analysis

Lungs were processed for histology after fixation in neutral-buffered formalin. Frontal sections through central levels of each lung were stained with H&E, Sirius Red or immunohistochemistry (IHC) for smooth muscle actin (anti-α-SMA, DAKO) following standard protocols. To quantify fibrotic changes, as many as possible nonoverlapping low-magnification (4×) microscopic fields from representative sections of each lung stained with H&E, were photographed, avoiding artifacts from interlobe spaces and major bronchi and blood vessels. The transparent area of each section, made up mainly by alveolar spaces and small airways was semiautomatically quantified using NIKON NIS elements. Areas stained positive for α-SMA were quantified in a parallel fashion.

**SUPPLEMENTAL REFERENCES**

- Ciraolo, E., Morello, F., Hobbs, R.M., Wolf, F., Marone, R., Iezzi, M., Lu, X., Mengozzi, G., Altruda, F., Sorba, G., et al. (2010). Essential role of the p110beta subunit of phosphoinositide 3-OH kinase in male fertility. *Mol. Biol. Cell* *21*, 704–711.
- Dou, Z., Chattopadhyay, M., Pan, J.A., Guerriero, J.L., Jiang, Y.P., Ballou, L.M., Yue, Z., Lin, R.Z., and Zong, W.X. (2010). The class IA phosphatidylinositol 3-kinase p110-beta subunit is a positive regulator of autophagy. *J. Cell Biol.* *191*, 827–843.
- Ellis, C.A., Vos, M.D., Howell, H., Vallecorsa, T., Fults, D.W., and Clark, G.J. (2002). Rig is a novel Ras-related protein and potential neural tumor suppressor. *Proc. Natl. Acad. Sci. USA* *99*, 9876–9881.
- Kontani, K., Tada, M., Ogawa, T., Okai, T., Saito, K., Araki, Y., and Katada, T. (2002). Di-Ras, a distinct subgroup of ras family GTPases with unique biochemical properties. *J. Biol. Chem.* *277*, 41070–41078.
- Kurosu, H., and Katada, T. (2001). Association of phosphatidylinositol 3-kinase composed of p110beta-catalytic and p85-regulatory subunits with the small GTPase Rab5. *J. Biochem.* *130*, 73–78.
- Lu, Z., Luo, R.Z., Lu, Y., Zhang, X., Yu, Q., Khare, S., Kondo, S., Kondo, Y., Yu, Y., Mills, G.B., et al. (2008). The tumor suppressor gene ARHI regulates autophagy and tumor dormancy in human ovarian cancer cells. *J. Clin. Invest.* *118*, 3917–3929.
- Shin, H.W., Hayashi, M., Christoforidis, S., Lacas-Gervais, S., Hoepfner, S., Wenk, M.R., Modregger, J., Uttenweiler-Joseph, S., Wilm, M., Nystuen, A., et al. (2005). An enzymatic cascade of Rab5 effectors regulates phosphoinositide turnover in the endocytic pathway. *J. Cell Biol.* *170*, 607–618.
- Utermark, T., Rao, T., Cheng, H., Wang, Q., Lee, S.H., Wang, Z.C., Iglehart, J.D., Roberts, T.M., Muller, W.J., and Zhao, J.J. (2012). The p110 $\alpha$  and p110 $\beta$  isoforms of PI3K play divergent roles in mammary gland development and tumorigenesis. *Genes Dev.* *26*, 1573–1586.
- Wynn, T.A., and Ramalingam, T.R. (2012). Mechanisms of fibrosis: therapeutic translation for fibrotic disease. *Nat. Med.* *18*, 1028–1040.
- Zhao, J.J., Cheng, H., Jia, S., Wang, L., Gjoerup, O.V., Mikami, A., and Roberts, T.M. (2006). The p110alpha isoform of PI3K is essential for proper growth factor signaling and oncogenic transformation. *Proc. Natl. Acad. Sci. USA* *103*, 16296–16300.

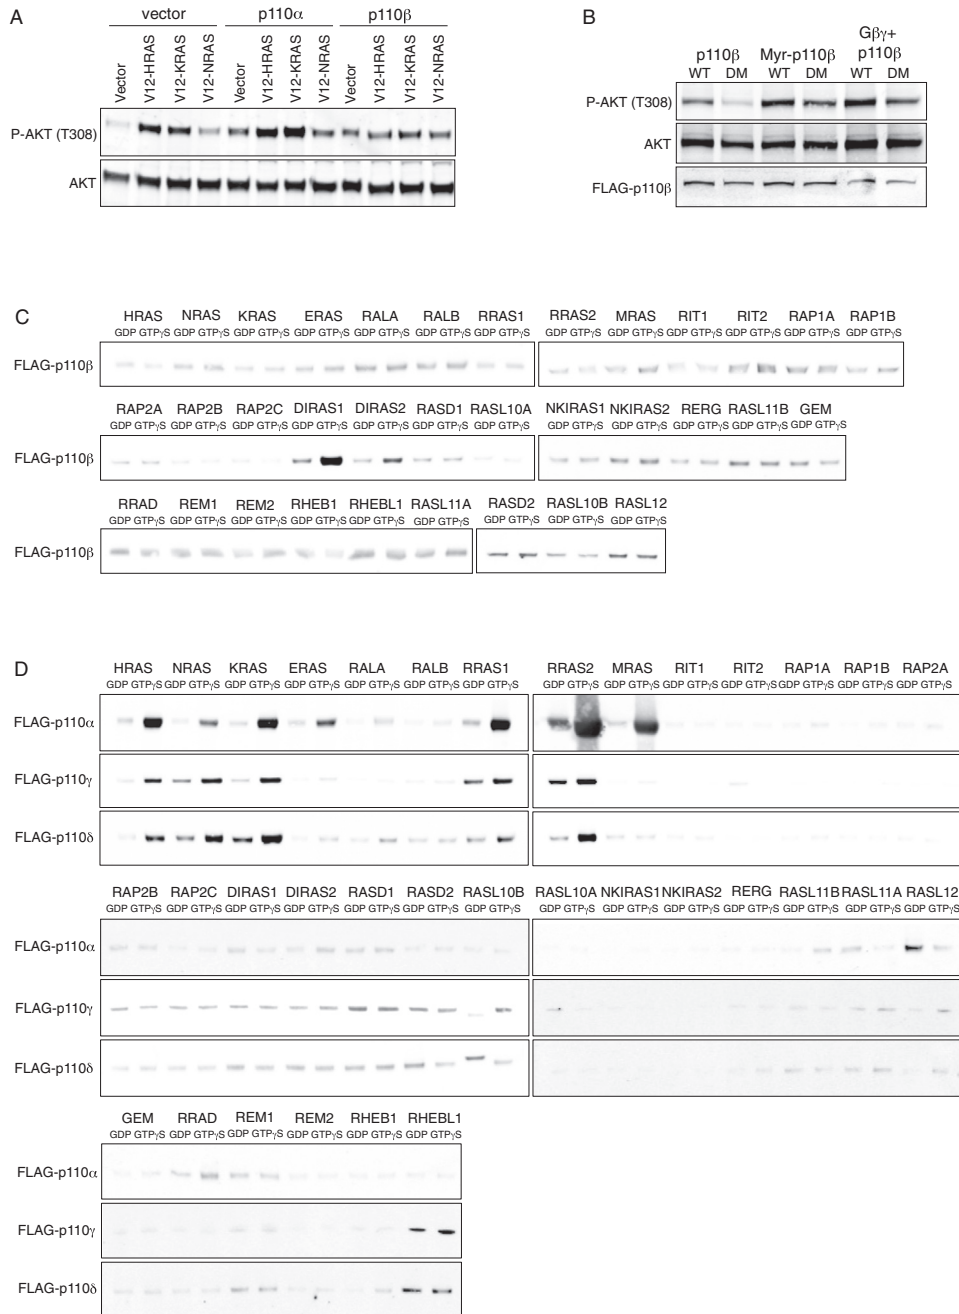

**Figure S1. PI 3-Kinase p110β Is Unable to Interact with RAS, Related to Figure 1**

(A) Active RAS proteins fail to stimulate p110β in cells. Constitutively active mutants of HRAS, KRAS and NRAS were expressed in COS7 cells along with empty vector, p110α/p85 or p110β/p85. Cells were serum-starved and protein lysates were made for western blot analysis.

(B) p110β-RBD-DM is functionally compromised in intact cells. Wild-type p110β or p110β-RBD-DM were expressed at low levels in COS7 cells, along with p85. Cells were serum-starved and protein lysates were made for western blot analysis. Gβγ, coexpression of Gβ<sub>2</sub> and Gγ<sub>1</sub>; Myr, myristoylated p110β.

(C) DIRAS1 and DIRAS2 bind p110β in a GTP-dependent manner. cDNAs encoding all 34 murine members of the RAS subfamily of small GTPases (RFGs) were cloned into pGEX-2T and verified by sequencing. GST-tagged RFGs were expressed in *E. coli*, purified on glutathione agarose, loaded with GDP/GTPγS in vitro and incubated with lysates from transfected COS7 cells, expressing FLAG-p110β/p85.

(D) Non-β isoforms bind to RAS proteins and a number of closely related RFGs. GST-tagged RFGs were purified from *E. coli* lysates and loaded with GDP/GTPγS in vitro. FLAG-tagged p110α, p110γ and p110δ were expressed in COS7 cells along with their respective regulatory subunits p85 or p101. COS7 cell lysates were incubated with GTPases for 1 hr and bound p110 was detected by western blot for FLAG.



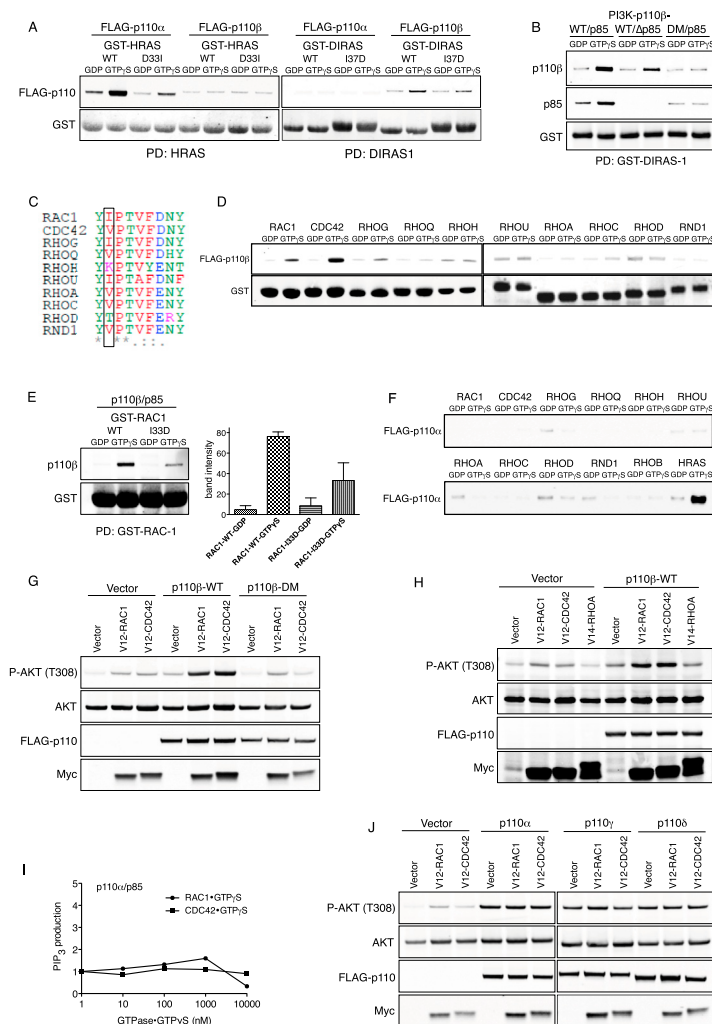

**Figure S2. RAC and CDC42 Directly Bind and Activate p110 $\beta$ , Related to Figure 2**

(A) RAS-D33/DIRAS-I37 are essential residues for isoform-specific PI3K binding. Left: GST-tagged wild-type and D33I mutant HRAS were expressed in *E. coli*, purified on glutathione agarose beads, loaded with GDP/GTP $\gamma$ S in vitro, and incubated with lysates from transfected COS7 cells expressing FLAG-p110 $\alpha$ /p85 or FLAG-p110 $\beta$ /p85. Right: GST-tagged wild-type and I37D mutant DIRAS1 were probed for binding FLAG-p110 $\alpha$ /p85 or FLAG-p110 $\beta$ /p85. Bound p110 was identified by western blot for FLAG.

(B) DIRAS1 is unable to bind p110 $\beta$ -RBD-DM protein. GST pull-down assay assessing binding of purified recombinant p110 $\beta$ /p85 complexes to immobilized, GDP-/GTP $\gamma$ S-loaded DIRAS1. Lanes 1/2: p85/p110 $\beta$  wild-type; Lanes 3/4:  $\Delta$ p85/p110 $\beta$  wild-type; Lanes 5/6: p85/p110 $\beta$ -RBD-DM.  $\Delta$ p85 is depicted in Figure 3C.

(C) G2 box sequences of RHO GTPases. Color-coded amino acid sequence alignment of the G2 boxes of indicated RHO GTPases, frame highlights RAC1-I33 residue.

(D) RAC1 and CDC42 bind p110 $\beta$  in a GTP-dependent manner. Purified recombinant, GST-tagged and GDP/GTP $\gamma$ S-loaded RHO subfamily GTPases were incubated with lysates from COS7 cells expressing FLAG-p110 $\beta$ /p85.

(E) RAC1-I33 is critical for p110 $\beta$  binding. Purified recombinant wild-type RAC1 and a RAC1-I33D mutant were compared for GTP-dependent binding to purified recombinant p110 $\beta$ /p85 (50 nM). Representative experiment and quantification of two independent experiments are shown (mean and SEM).

(F) RHO family GTPases do not bind p110 $\alpha$ . 11 selected RHO family GTPases were expressed in *E. coli*, purified on glutathione agarose beads and loaded with GDP/GTP $\gamma$ S in vitro. HRAS was included as positive control. Pull-down was made from a lysate of transfected COS7 cells expressing FLAG-p110 $\alpha$ /p85.

(G) RAC and CDC42 activate p110 $\beta$  wild-type but not p110 $\beta$ -RBD-DM in transfected cells. Constitutively active mutants of RAC1 and CDC42 (Myc-tagged) were expressed in COS7 cells along with empty vector, FLAG-p110 $\beta$ /p85 or FLAG-p110 $\beta$ -RBD-DM/p85.

(H) RAC1 and CDC42, but not RHOA activate p110 $\beta$  in transfected cells. Constitutively active mutants of RAC1, CDC42 and RHOA (Myc-tagged) were expressed in COS7 cells along with empty vector or FLAG-p110 $\beta$ /p85. Cells were serum-starved, and protein lysates were made for western blot analysis.

(I) RAC and CDC42 fail to stimulate p110 $\alpha$  lipid kinase activity in vitro. Representative lipid kinase assay assessing the effect of increasing concentrations of purified recombinant GTP $\gamma$ S-loaded RAC1 and CDC42 on the activity of purified recombinant p110 $\alpha$ /p85 protein complexes.

(J) RAC and CDC42 fail to activate p110 $\alpha$ , p110 $\gamma$  and p110 $\delta$  in transfected cells. Constitutively active mutants of RAC1 and CDC42 (Myc-tagged) were expressed in COS7 cells along with empty vector, FLAG-tagged p110 $\alpha$ /p85, p110 $\gamma$ /p101 or p110 $\delta$ /p85. Cells were serum-starved, and protein lysates were made for western blot analysis.

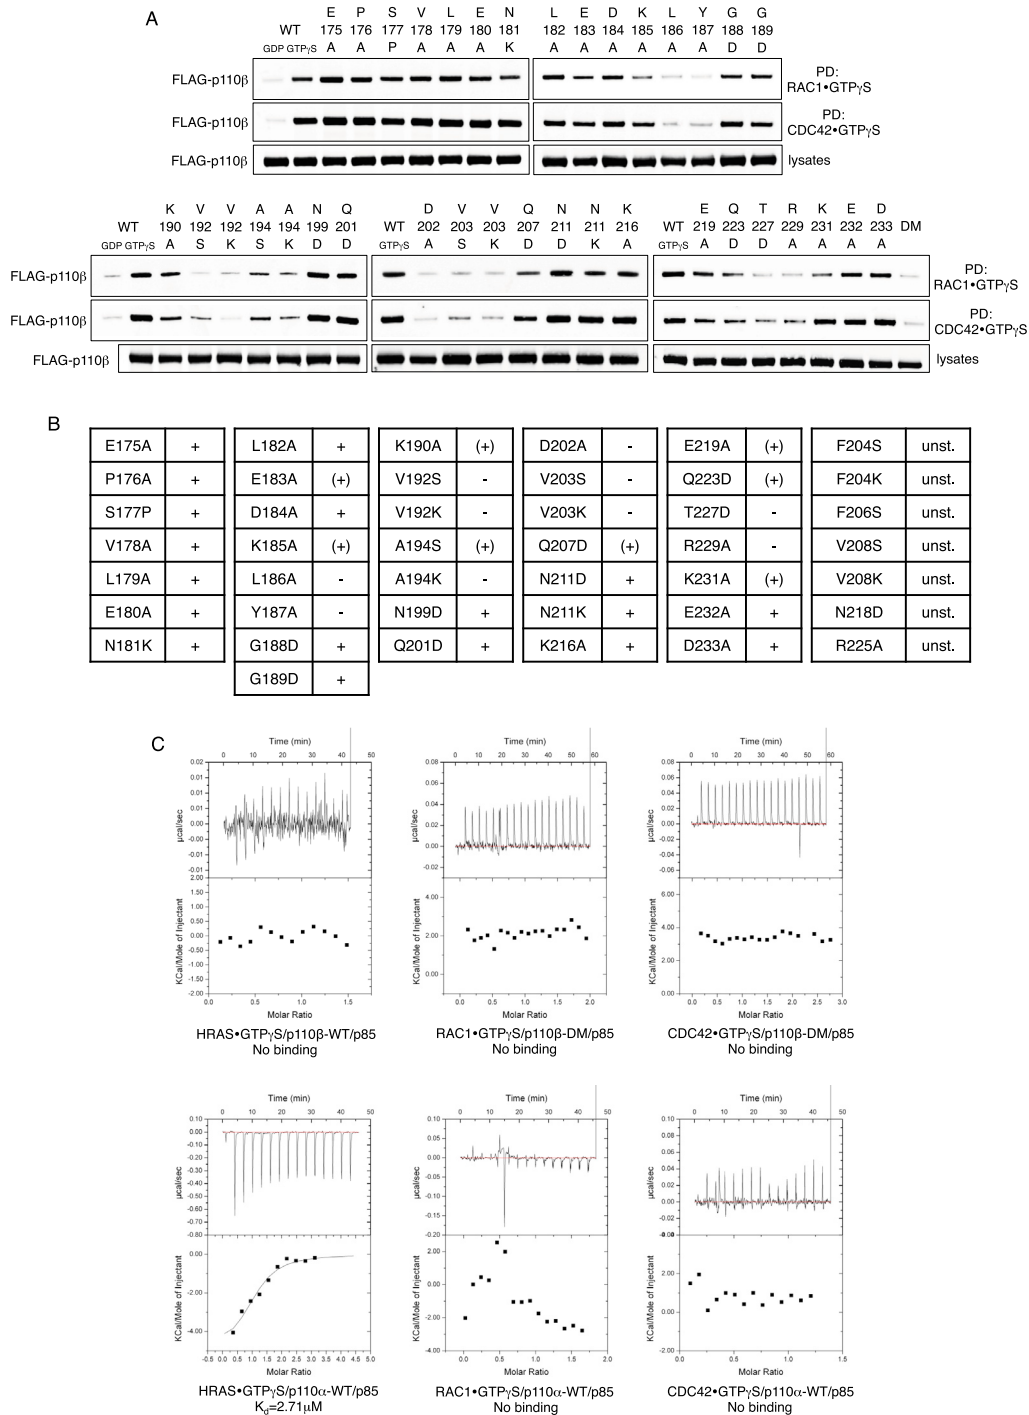

**Figure S3. RAC and CDC42 Are Interactors of the p110 $\beta$  RAS-Binding Domain, Related to Figure 3**

(A) Single point mutations across the p110 $\beta$  RBD disrupt binding to RAC and CDC42. 43 single point mutations of 37 RBD residues were introduced by site-directed mutagenesis. Mutants were expressed in COS7 cells, along with p85, and lysates were incubated with GST-tagged, GTP $\gamma$ S-loaded RAC1 and CDC42. Bound p110 $\beta$  was detected by western blot for FLAG. Mutants with reduced protein expression levels were deemed unstable and excluded from experiments. (B) Table summarizing results from GST pull-down studies shown in (A). Point mutations made are listed along with their impact on binding to RAC1 and CDC42 (+, no effect on binding; +), reduced binding; -, complete or near complete loss of binding; unst., unstable protein). (C) Panel of representative ITC experiments investigating the thermodynamics of the interaction between indicated GTP $\gamma$ S-loaded small GTPases and recombinant p110/p85 complexes in solution. Top: the differential power recorded directly over time; bottom: thermal energy (H) over molar ratio.

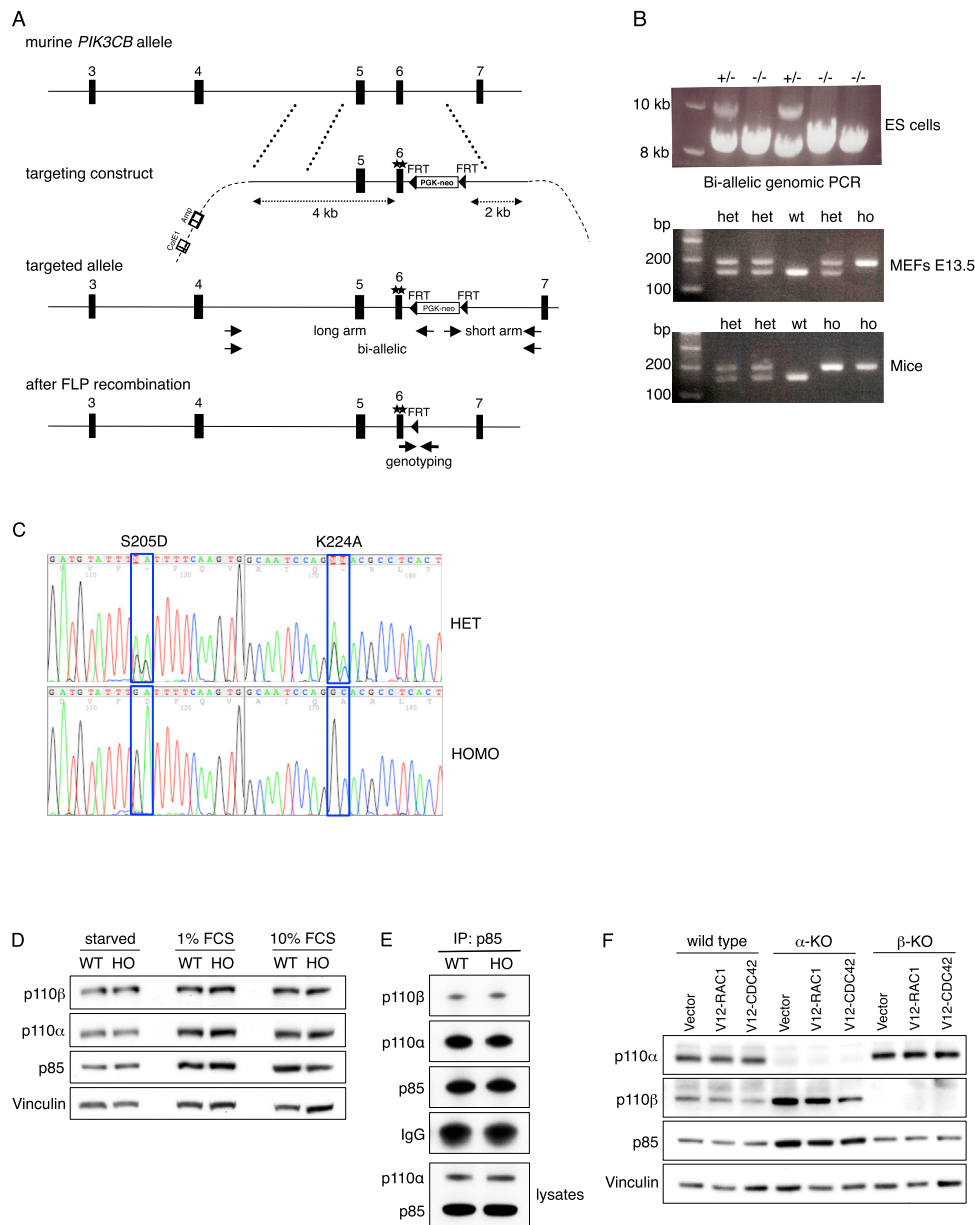

**Figure S4. RAC/CDC42 Binding to p110 $\beta$  Regulates PI3K Activity In Vivo, Related to Figure 4**

(A) Targeting strategy to replace exon 6 of the murine *Pik3cb* gene, encoding the p110 $\beta$  catalytic subunit. An FRT-flanked neomycin selection cassette was inserted into murine genomic DNA provided by a BAC clone, immediately downstream of *Pik3cb* exon 6, using Red/ET recombination technology (GeneBridges). Selection cassette and flanking arms of genomic DNA were sub-cloned and mutations ( $\star$ ) introduced by site-directed mutagenesis. Arrows indicate priming sites for ES cell screening and genotyping. The neomycin selection cassette was later removed by crosses of heterozygous p110 $\beta$ -RBD-DM mice with FLPe mice. (B) ES cell screening and genotyping. Homologous recombination in ES cells was confirmed by long genomic PCR bridging the entire targeting region (top, targeted allele 10kb, wild-type allele 8.5kb). After FLP recombination, MEFs (middle) and mice (bottom) were genotyped using primer pairs flanking the remaining FRT adjacent to exon 6.

(C) Genomic sequencing confirms presence of mutations. Genomic DNA from heterozygous and homozygous p110 $\beta$ -RBD-DM mice was isolated and exon 6 was PCR amplified and sequenced using standard techniques.

(D) Normal expression of type I PI3K subunits in p110 $\beta$ -RBD-DM MEFs. Wild-type and homozygous p110 $\beta$ -RBD-DM MEFs were maintained in 0%, 1% and 10% FCS, respectively. Lysates were made for western blot analysis.

(E) Undisturbed stoichiometry of type I PI3K subunits in p110 $\beta$ -RBD-DM MEFs. p85 protein was immunoprecipitated from whole-cell lysates made from wild-type and p110 $\beta$ -RBD-DM MEFs. The coprecipitation of p110 $\alpha$  and p110 $\beta$  along with p85 was assessed by western blot.

(F) Deletion of p110 $\alpha$  and p110 $\beta$  in conditional knockout MEFs. Immortalized p110 $\alpha^{\text{lox/lox}}$ ;CreER $^{+/-}$  and p110 $\beta^{\text{lox/lox}}$ ;CreER $^{+/-}$  MEFs were treated with 4-hydroxytamoxifen (1  $\mu$ M) for 3 consecutive days, prior to use in experiments.

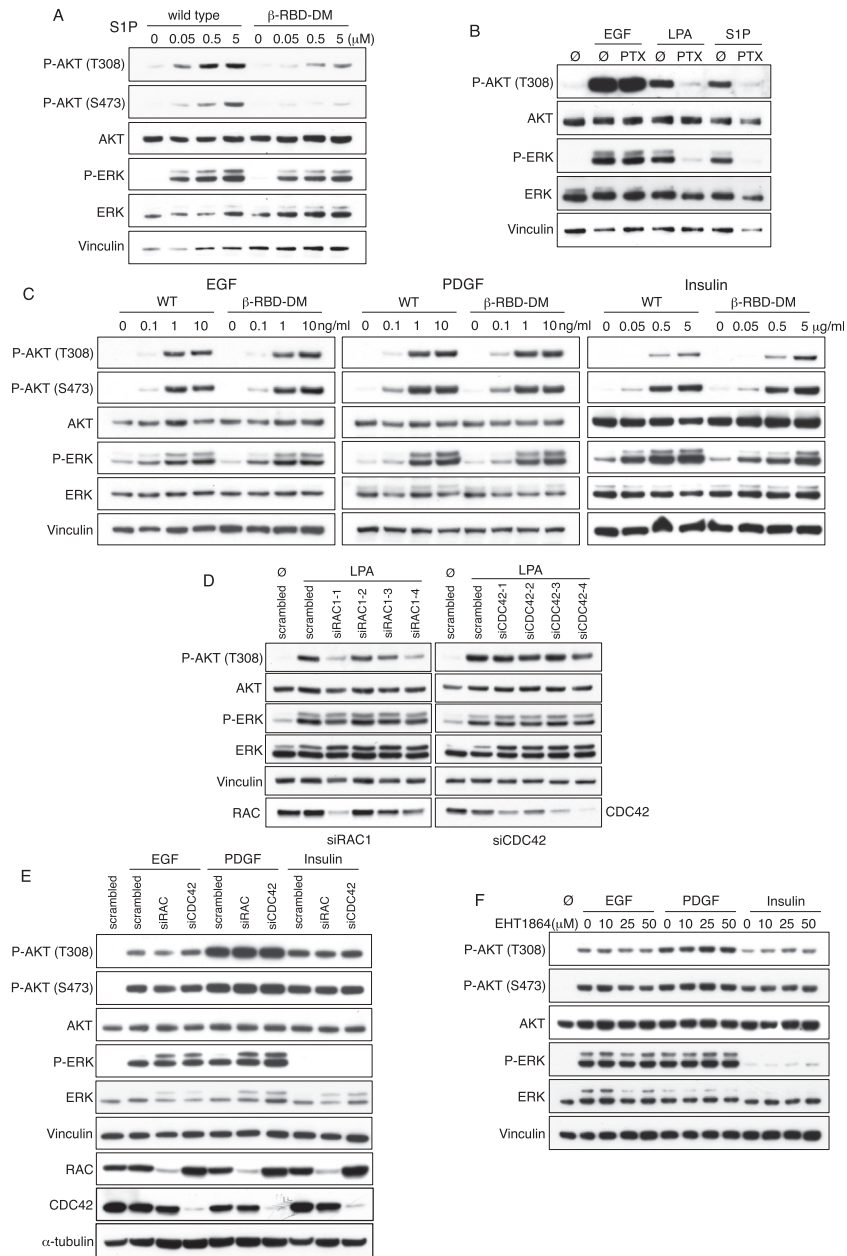

**Figure S5. RAC Activates p110β Downstream of G Protein-Coupled Receptors, Related to Figure 5**

(A) S1P-induced AKT phosphorylation is attenuated in p110β-RBD-DM MEFs. Primary wild-type and homozygous p110β-RBD-DM MEFs were serum-starved and stimulated with sphingosine 1-phosphate (S1P) at indicated doses. Cells were harvested for western blot after 5 min.

(B) LPA/S1P-induced phosphorylation of AKT and ERK is sensitive to PTX. Immortalized wild-type MEFs were serum starved overnight and stimulated with EGF, LPA or S1P for 5 min. Pertussis toxin (PTX, 200 ng/ml) was added 16 prior to stimulation where indicated.

(C) Normal receptor tyrosine kinase signaling in p110β-RBD-DM MEFs. Primary wild-type and p110β-RBD-DM MEFs were serum-starved and stimulated with EGF, PDGF or insulin at indicated doses. Cells were harvested for western blot after 5 min.

(D) Deconvolution of RAC1 and CDC42 siRNA pools. Immortalized wild-type MEFs were transfected with scrambled duplex or gene-specific individual siRNA oligonucleotides targeting RAC1 or CDC42. 48 hr after transfection, serum-starved cells were stimulated with LPA (10 μM) for 5 min.

(E) RAC and CDC42 are not required for AKT phosphorylation induced by receptor tyrosine kinase agonists. Immortalized wild-type MEFs were transfected with scrambled duplex or gene-specific siRNA pools targeting RAC1 or CDC42. Serum-starved cells were stimulated with EGF (10 ng/ml), PDGF (10 ng/ml) or insulin (5 μg/ml) for 5 min, before they were harvested for western blot.

(F) AKT phosphorylation downstream of receptor tyrosine kinases does not require RAC activity. Immortalized wild-type MEFs were serum-starved and incubated with EHT1864 at the indicated doses for 30 min, before they were stimulated with EGF (10 ng/ml), PDGF (10 ng/ml) or insulin (5 μg/ml) for 5 min.



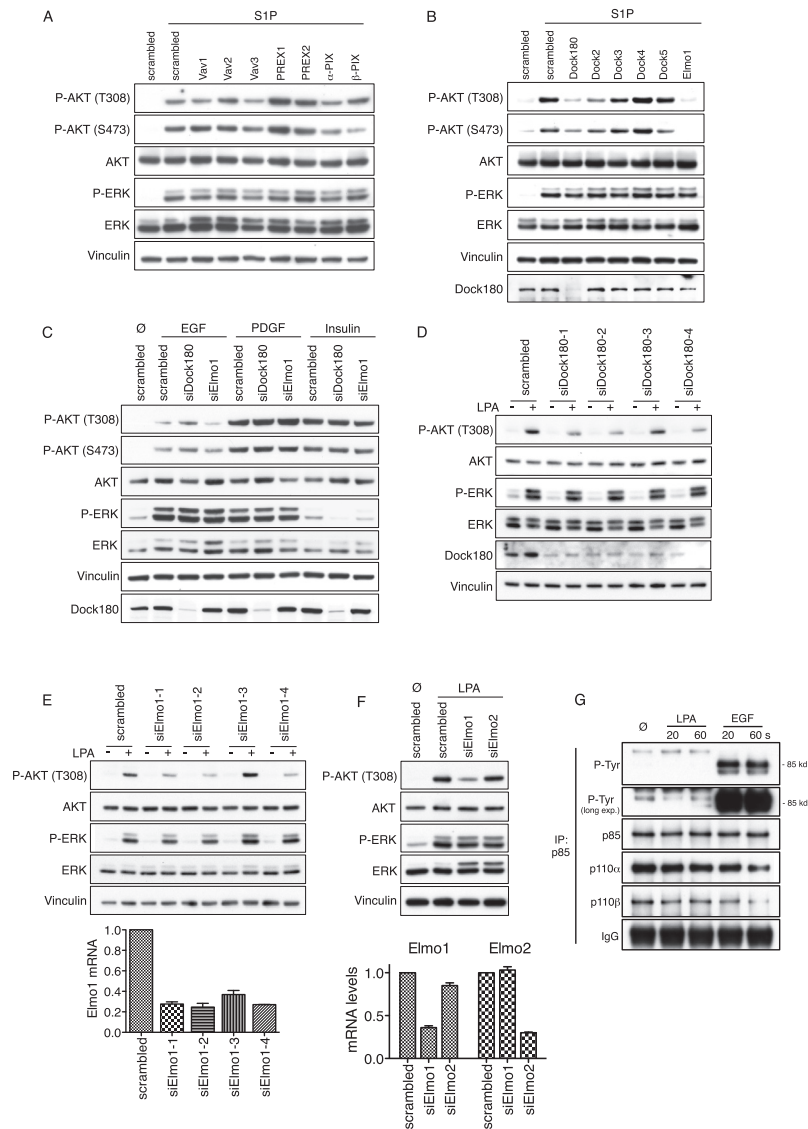

**Figure S6. Dock180/Elmo1 Activate RAC Downstream of GPCRs and Upstream of p110 $\beta$ , Related to Figure 6**

(A) siRNA pools targeting Dbl family RAC-GEFs fail to affect S1P-induced AKT phosphorylation. Immortalized wild-type MEFs were transfected with scrambled duplex or gene-specific siRNA pools targeting indicated Dbl family RAC-GEFs. Forty-eight hours after transfection, serum-starved cells were stimulated with S1P (1  $\mu$ M) for 5 min.

(B) Dock180 and Elmo1 are essential for S1P-induced AKT phosphorylation. Immortalized wild-type MEFs were transfected with scrambled duplex or gene-specific siRNA pools targeting indicated Dock family RAC-GEFs. Forty-eight hours after transfection, serum-starved cells were stimulated with S1P (1  $\mu$ M) for 5 min.

(C) Knockdown of Dock180 or Elmo1 does not affect signaling downstream of receptor tyrosine kinases. Immortalized wild-type MEFs were transfected with scrambled duplex or siRNA pools targeting Dock180 or Elmo1. Cells were serum starved and stimulated with EGF (10 ng/ml), PDGF (10 ng/ml) or insulin (5  $\mu$ g/ml) for 5 min.

(D) Deconvolution of Dock180 siRNA pool. Immortalized wild-type MEFs were transfected with scrambled duplex or gene-specific individual siRNA oligonucleotides targeting Dock180. Forty-eight hours after transfection, serum-starved cells were stimulated with LPA (10  $\mu$ M) for 5 min.

(E) Deconvolution of Elmo1 siRNA pool. Immortalized wild-type MEFs were transfected with scrambled duplex or gene-specific single siRNA oligonucleotides targeting Elmo1. Forty-eight hours after transfection, serum-starved cells were stimulated with LPA (10  $\mu$ M) for 5 min. RNA was extracted in parallel experiments and Elmo1 mRNA levels were compared by qPCR (mean with SEM).

(F) Knockdown of Elmo1 but not Elmo2 affects LPA-induced AKT phosphorylation. Immortalized wild-type MEFs were transfected with scrambled duplex or gene-specific siRNA pools targeting Elmo1 or Elmo2, and serum-starved cells were stimulated with LPA for 5 min. Elmo1/Elmo2 mRNA levels were assessed by qPCR (mean with SEM).

(G) Rapid p85 tyrosine phosphorylation upon EGF but not LPA stimulation. Immortalized wild-type MEFs were serum-starved and stimulated with EGF (10 ng/ml) or LPA (10  $\mu$ M) for 20 and 60 s, before cell lysates were made, and p85 immunoprecipitates were analyzed by western blot as shown.

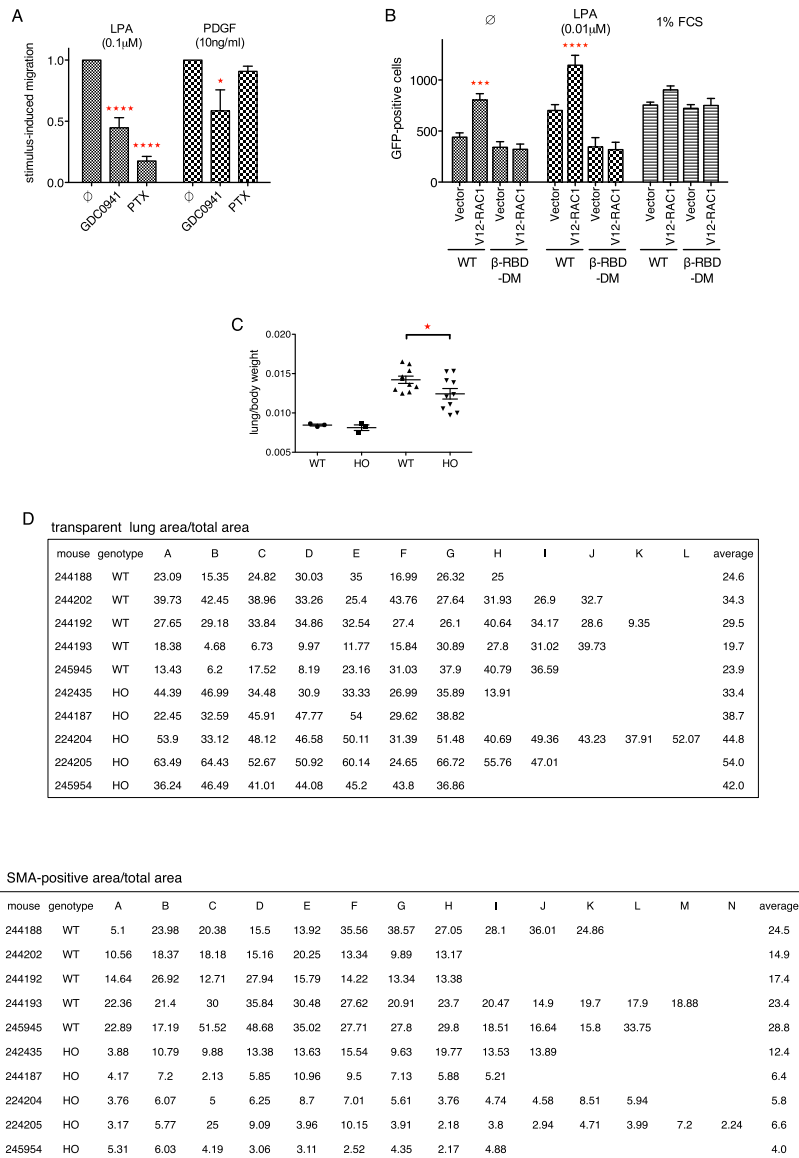

**Figure S7. p110β-RBD-DM Mice Are Protected from Bleomycin-Induced Lung Fibrosis, Related to Figure 7**

(A) Fibroblasts migration in gradients of LPA and PDGF requires PI3K activity. Serum-starved immortalized wild-type MEFs were seeded onto fibronectin-coated membrane inserts and placed into 24-well plates containing serum-free medium and the indicated chemoattractants. Where indicated, GDC0941 (5 μM) or PTX (200 ng/ml) were added 30 min and 16 hr prior to seeding, respectively, and were present throughout experiments. After 6 hr, migrated cells were semi-automatically counted and numbers were normalized to control conditions (n = 3; mean with SEM; repeated-measures ANOVA).

(B) Constitutively active RAC1 promotes migration of wild-type but not p110β-RBD-DM fibroblasts. Migration of transfected wild-type and p110β-RBD-DM MEFs in starvation medium and gradients of LPA (10 nM) and FCS (1%) were assessed in transwell filter assays (n = 6 from 2 independent experiments; mean with SEM; 1way ANOVA).

(C) p110β-RBD-DM mice show less increase in lung weight after bleomycin challenge. Age- and sex-matched wild-type and p110β-RBD-DM mice received saline (n = 3 per genotype) or bleomycin (n = 10 per genotype) via intratracheal instillation and were culled 14 days later (mean ± SEM; t test).

(D) Morphometric quantification of transparent lung areas after bleomycin challenge. Wild-type and p110β-RBD-DM mice received a single dose bleomycin via intratracheal instillation. After two weeks, lungs were fixed, sectioned and stained with H&E. As many as possible nonoverlapping areas (A–L), avoiding artifacts from interlobes and major bronchi/vessels, of representative sections from each lung were photographed at low (4×) magnification and transparent (white) areas within each image were quantified using Nikon NIS elements software.

(E) Morphometric quantification of α-SMA-positive areas after bleomycin challenge. Wild-type and p110β-RBD-DM mice received a single dose bleomycin via intratracheal instillation. After two weeks, lungs were fixed, sectioned and stained with immunohistochemistry for smooth muscle antigen (α-SMA). As many as possible nonoverlapping areas (A–N), avoiding artifacts from bronchi and blood vessels, of representative sections from each lung were photographed at low (4×) magnification and positive (brown) areas within each image were quantified using Nikon NIS elements software.
